# Supplementary material
Source: PubMed Central journal article supplement (PMC5851439)
Supplement: NIHMS944566-supplement-STable_1.pdf [file NIHMS944566-supplement-STable_1.pdf]

**STable 1 Top SNPs ( $P < 0.00001$ ) associated with overall survival of pancreatic cancer patients in PanScanII + PanC4**

| SNP         | Chrom. | Gene      | Allele | Funcioal annotation <sup>a</sup> | Genotype | HR (95% CI) <sup>b</sup> | $P$ value <sup>b</sup> | N (Dead Alive) | MST (month) <sup>c</sup> | Log-rank $P$ | $P$ value <sup>d</sup> | Genotype source <sup>e</sup> | Quality score <sup>f</sup> | MAF   |
|-------------|--------|-----------|--------|----------------------------------|----------|--------------------------|------------------------|----------------|--------------------------|--------------|------------------------|------------------------------|----------------------------|-------|
| rs113988120 | 2      | PAIP2B    | T>A    | 6                                | AA       | 1.00                     | -                      | 721 118        | 14.87                    |              |                        | FullImputed                  | 0.896                      | 0.015 |
|             |        |           |        |                                  | AT       | 3.06 (2.10-4.47)         | 6.40E-09               | 29 0           | 9.67                     |              |                        |                              |                            |       |
|             |        |           |        |                                  | TT       | -                        | -                      | 0              | -                        | 1.60E-05     | 6.40E-09               |                              |                            |       |
| rs112493246 | 2      | DYSF      | G>C    | 5                                | CC       | 1.00                     | -                      | 721 118        | 14.87                    |              |                        | FullImputed                  | 0.882                      | 0.016 |
|             |        |           |        |                                  | CG       | 3.06 (2.10-4.47)         | 6.40E-09               | 29 0           | 9.67                     |              |                        |                              |                            |       |
|             |        |           |        |                                  | GG       | -                        | -                      | 0              | -                        | 1.60E-05     | 6.40E-09               |                              |                            |       |
| rs138529893 | 2      | DYSF      | G>A    | 5                                | AA       | 1.00                     | -                      | 721 118        | 14.87                    |              |                        | FullImputed                  | 0.88                       | 0.016 |
|             |        |           |        |                                  | AG       | 3.06 (2.10-4.47)         | 6.40E-09               | 29 0           | 9.67                     |              |                        |                              |                            |       |
|             |        |           |        |                                  | GG       | -                        | -                      | 0              | -                        | 1.60E-05     | 6.40E-09               |                              |                            |       |
| rs4780973   | 16     | DC1019270 | C>T    | 5                                | TT       | 1.00                     | -                      | 377 53         | 12.7                     |              |                        | FullImputed                  | 0.995                      | 0.692 |
|             |        |           |        |                                  | TC       | 0.79 (0.68-0.92)         | 0.0022                 | 315 50         | 15.03                    |              |                        |                              |                            |       |
|             |        |           |        |                                  | CC       | 0.50 (0.38-0.66)         | 1.30E-06               | 58 15          | 21.7                     | 3.40E-03     | 1.10E-07               |                              |                            |       |
| rs73678290  | 8      |           | A>C    | 7                                | CC       | 1.00                     | -                      | 725 117        | 14.83                    |              |                        | FullImputed                  | 0.84                       | 0.018 |
|             |        |           |        |                                  | CA       | 3.22 (2.15-4.83)         | 1.60E-08               | 24 1           | 6.9                      |              |                        |                              |                            |       |
|             |        |           |        |                                  | AA       | 1.73 (0.24-12.41)        | 0.58                   | 1 0            | 9.53                     | 8.50E-05     | 1.50E-07               |                              |                            |       |
| rs188829692 | 17     |           | G>A    | 7                                | AA       | 1.00                     | -                      | 729 118        | 14.83                    |              |                        | FullImputed                  | 0.577                      | 0.015 |
|             |        |           |        |                                  | AG       | 3.32 (2.13 -5.17)        | 1.10E-07               | 21 0           | 7.9                      |              |                        |                              |                            |       |
|             |        |           |        |                                  | GG       | -                        | -                      | 0              | -                        | 9.90E-07     | 2.40E-07               |                              |                            |       |
| rs112013185 | 10     |           | T>G    | 6                                | GG       | 1.00                     | -                      | 682 116        | 15.03                    |              |                        | FullImputed                  | 0.899                      | 0.048 |
|             |        |           |        |                                  | GT       | 1.88 (1.45-2.44)         | 2.00E-06               | 64 2           | 9.6                      |              |                        |                              |                            |       |
|             |        |           |        |                                  | TT       | 2.84 (1.06-7.62)         | 0.039                  | 4 0            | 10.2                     | 3.40E-05     | 2.70E-07               |                              |                            |       |
| rs116820831 | 4      |           | C>T    | 6                                | TT       | 1.00                     | -                      | 721 117        | 15.03                    |              |                        | FullImputed                  | 0.665                      | 0.024 |
|             |        |           |        |                                  | TC       | 2.67 (1.83-3.89)         | 3.20E-07               | 29 1           | 9.35                     |              |                        |                              |                            |       |
|             |        |           |        |                                  | CC       | -                        | -                      | 0              | -                        | 7.80E-06     | 3.20E-07               |                              |                            |       |
| rs62079230  | 18     |           | A>T    | 7                                | TT       | 1.00                     | -                      | 707 117        | 14.93                    |              |                        | FullImputed                  | 0.556                      | 0.028 |
|             |        |           |        |                                  | TA       | 2.26 (1.65-3.09)         | 3.20E-07               | 43 1           | 11.03                    |              |                        |                              |                            |       |
|             |        |           |        |                                  | AA       | -                        | -                      | 0              | -                        | 7.50E-04     | 3.20E-07               |                              |                            |       |
| rs36100506  | 10     |           | T>C    | 6                                | CC       | 1.00                     | -                      | 632 105        | 15.3                     |              |                        | FullImputed                  | 0.991                      | 0.085 |
|             |        |           |        |                                  | CT       | 1.60 (1.30-1.97)         | 8.00E-06               | 108 13         | 11.23                    |              |                        |                              |                            |       |
|             |        |           |        |                                  | TT       | 2.46 (1.30-4.64)         | 0.0056                 | 10 0           | 8.6                      | 4.20E-03     | 3.40E-07               |                              |                            |       |
| rs112200284 | 11     |           | G>A    | 7                                | AA       | 1.00                     | -                      | 647 114        | 15.13                    |              |                        | FullImputed                  | 0.74                       | 0.068 |
|             |        |           |        |                                  | AG       | 1.73 (1.40-2.14)         | 3.10E-07               | 102 4          | 10.88                    |              |                        |                              |                            |       |
|             |        |           |        |                                  | GG       | 1.53 (0.21-10.91)        | 0.67                   | 1 0            | 15.7                     | 1.70E-04     | 3.70E-07               |                              |                            |       |
| rs142127366 | 11     |           | C>T    | 7                                | TT       | 1.00                     | -                      | 728 117        | 14.87                    |              |                        | FullImputed                  | 0.736                      | 0.019 |
|             |        |           |        |                                  | TC       | 3.08 (1.99-4.74)         | 3.80E-07               | 22 1           | 9.2                      |              |                        |                              |                            |       |
|             |        |           |        |                                  | CC       | -                        | -                      | 0              | -                        | 1.80E-07     | 3.80E-07               |                              |                            |       |
| rs8048358   | 16     |           | A>G    | 4                                | GG       | 1.00                     | -                      | 368 48         | 13.07                    |              |                        | FullImputed                  | 0.987                      | 0.315 |
|             |        |           |        |                                  | GA       | 0.79 (0.68-0.92)         | 0.0024                 | 322 55         | 15.07                    |              |                        |                              |                            |       |
|             |        |           |        |                                  | AA       | 0.51 (0.39-0.68)         | 2.20E-06               | 60 15          | 21.57                    | 4.80E-03     | 4.20E-07               |                              |                            |       |
| rs11643122  | 16     |           | A>G    | 7                                | GG       | 1.00                     | -                      | 370 49         | 13.07                    |              |                        | FullImputed                  | 0.987                      | 0.31  |
|             |        |           |        |                                  | GA       | 0.79 (0.68-0.92)         | 0.0025                 | 320 55         | 15.07                    |              |                        |                              |                            |       |
|             |        |           |        |                                  | AA       | 0.51 (0.39-0.68)         | 2.40E-06               | 60 14          | 21.57                    | 5.80E-03     | 4.50E-07               |                              |                            |       |
| rs12773660  | 10     |           | T>A    | 7                                | AA       | 1.00                     | -                      | 634 105        | 15.3                     |              |                        | FullImputed                  | 0.986                      | 0.086 |
|             |        |           |        |                                  | AT       | 1.59 (1.30-1.96)         | 1.10E-05               | 106 13         | 11.23                    |              |                        |                              |                            |       |
|             |        |           |        |                                  | TT       | 2.45 (1.30-4.62)         | 0.0057                 | 10 0           | 8.6                      | 6.40E-03     | 4.70E-07               |                              |                            |       |
| rs35638978  | 10     |           | C>T    | 5                                | TT       | 1.00                     | -                      | 634 105        | 15.3                     |              |                        | FullImputed                  | 0.988                      | 0.086 |

|             |    |         |     |    |    |                  |          |         |       |          |          |                 |       |       |
|-------------|----|---------|-----|----|----|------------------|----------|---------|-------|----------|----------|-----------------|-------|-------|
| rs17103318  | 10 |         | G>A | 2a | TC | 1.59 (1.30-1.96) | 1.10E-05 | 106 13  | 11.23 | 6.40E-03 | 4.70E-07 | FullImputed     | 0.988 | 0.086 |
|             |    |         |     |    | CC | 2.45 (1.30-4.62) | 0.0057   | 10 0    | 8.6   |          |          |                 |       |       |
|             |    |         |     |    | AA | 1.00             | -        | 634 105 | 15.3  |          |          |                 |       |       |
|             |    |         |     |    | AG | 1.59 (1.30-1.96) | 1.10E-05 | 106 13  | 11.23 |          |          |                 |       |       |
| rs11200956  | 10 |         | G>A | 6  | GG | 2.45 (1.30-4.62) | 0.0057   | 10 0    | 8.6   | 6.40E-03 | 4.70E-07 | FullImputed     | 0.99  | 0.085 |
|             |    |         |     |    | AA | 1.00             | -        | 634 105 | 15.3  |          |          |                 |       |       |
|             |    |         |     |    | AG | 1.59 (1.30-1.96) | 1.10E-05 | 106 13  | 11.23 |          |          |                 |       |       |
|             |    |         |     |    | GG | 2.45 (1.30-4.62) | 0.0057   | 10 0    | 8.6   |          |          |                 |       |       |
| rs9815265   | 3  | RAB6B   | T>C | 3a | CC | 1.00             | -        | 279 36  | 13.2  | 6.40E-03 | 4.70E-07 | ImputedInPanSca | 0.903 | 0.403 |
|             |    |         |     |    | CT | 0.87 (0.74-1.02) | 0.084    | 362 55  | 14.6  |          |          |                 |       |       |
|             |    |         |     |    | TT | 0.55 (0.44-0.69) | 2.00E-07 | 109 27  | 22.1  |          |          |                 |       |       |
|             |    |         |     |    | GG | 2.45 (1.30-4.62) | 0.0057   | 10 0    | 8.6   |          |          |                 |       |       |
| rs11200957  | 10 |         | C>G | 7  | GC | 1.59 (1.29-1.95) | 1.30E-05 | 107 13  | 11.23 | 7.10E-04 | 5.50E-07 | FullImputed     | 0.99  | 0.085 |
|             |    |         |     |    | CC | 2.45 (1.30-4.63) | 0.0057   | 10 0    | 8.6   |          |          |                 |       |       |
|             |    |         |     |    | AA | 1.00             | -        | 633 105 | 15.3  |          |          |                 |       |       |
|             |    |         |     |    | GG | 1.00             | -        | 633 105 | 15.3  |          |          |                 |       |       |
| rs11528377  | 10 |         | T>A | 6  | AT | 1.59 (1.29-1.95) | 1.30E-05 | 107 13  | 11.23 | 5.70E-03 | 5.70E-07 | FullImputed     | 0.99  | 0.085 |
|             |    |         |     |    | TT | 2.45 (1.30-4.63) | 0.0057   | 10 0    | 8.6   |          |          |                 |       |       |
|             |    |         |     |    | AA | 1.00             | -        | 633 105 | 15.3  |          |          |                 |       |       |
|             |    |         |     |    | GG | 1.00             | -        | 633 105 | 15.3  |          |          |                 |       |       |
| rs201397673 | 4  | STPG2   | X>T | 6  | TT | 1.00             | -        | 729 118 | 14.83 | 5.70E-03 | 5.70E-07 | FullImputed     | 0.612 | 0.019 |
|             |    |         |     |    | TX | 3.06 (1.97-4.75) | 6.40E-07 | 21 0    | 8     |          |          |                 |       |       |
|             |    |         |     |    | XX | -                | -        | 0       | 0     |          |          |                 |       |       |
|             |    |         |     |    | GG | 1.00             | -        | 182 44  | 16.87 |          |          |                 |       |       |
| rs6759841   | 2  |         | A>G | 7  | GA | 1.38 (1.16-1.64) | 0.00028  | 428 58  | 14.93 | 6.60E-05 | 6.40E-07 | FullImputed     | 0.648 | 0.447 |
|             |    |         |     |    | AA | 1.72 (1.38-2.14) | 1.40E-06 | 140 16  | 11.37 |          |          |                 |       |       |
|             |    |         |     |    | XX | 1.00             | -        | 722 116 | 14.87 |          |          |                 |       |       |
|             |    |         |     |    | XA | 2.64 (1.80-3.87) | 6.70E-07 | 28 2    | 8.3   |          |          |                 |       |       |
| rs71356106  | 9  |         | A>X | 6  | AA | -                | -        | 0       | 0     | 3.80E-04 | 6.70E-07 | FullImputed     | 0.634 | 0.017 |
|             |    |         |     |    | GG | 1.00             | -        | 310 42  | 13.5  |          |          |                 |       |       |
|             |    |         |     |    | GC | 0.83 (0.71-0.97) | 0.017    | 345 53  | 14.93 |          |          |                 |       |       |
|             |    |         |     |    | CC | 0.55 (0.44-0.70) | 5.70E-07 | 95 23   | 21.93 |          |          |                 |       |       |
| rs34606727  | 3  | B4GALT4 | X>G | 4  | GG | 1.00             | -        | 270 34  | 13.47 | 3.30E-03 | 6.90E-07 | FullImputed     | 0.997 | 0.419 |
|             |    |         |     |    | GX | 0.85 (0.73-1.00) | 0.047    | 358 54  | 14.2  |          |          |                 |       |       |
|             |    |         |     |    | XX | 0.57 (0.46-0.71) | 4.40E-07 | 122 30  | 20    |          |          |                 |       |       |
|             |    |         |     |    | CC | 1.00             | -        | 734 118 | 14.83 |          |          |                 |       |       |
| rs9829385   | 3  | C3orf58 | T>C | 6  | CT | 3.57 (2.16-5.90) | 7.20E-07 | 16 0    | 8.47  | 9.20E-05 | 7.00E-07 | FullImputed     | 0.913 | 0.011 |
|             |    |         |     |    | TT | -                | -        | 0       | 0     |          |          |                 |       |       |
|             |    |         |     |    | GG | 1.00             | -        | 635 105 | 15.3  |          |          |                 |       |       |
|             |    |         |     |    | GT | 1.58 (1.28-1.95) | 1.80E-05 | 105 13  | 11.23 |          |          |                 |       |       |
| rs11200952  | 10 |         | T>G | 7  | TT | 2.44 (1.29-4.61) | 0.0059   | 10 0    | 8.6   | 8.20E-03 | 7.60E-07 | ImputedInPanC   | 0.988 | 0.086 |
|             |    |         |     |    | TT | 1.00             | -        | 214 28  | 12.7  |          |          |                 |       |       |
|             |    |         |     |    | TC | 0.79 (0.67-0.94) | 0.0072   | 356 56  | 14    |          |          |                 |       |       |
|             |    |         |     |    | CC | 0.60 (0.49-0.74) | 8.40E-07 | 180 34  | 18.43 |          |          |                 |       |       |
| rs7003310   | 8  |         | C>T | 5  | GG | 1.00             | -        | 586 102 | 15.57 | 3.20E-02 | 7.80E-07 | FullImputed     | 0.873 | 0.108 |
|             |    |         |     |    | GT | 1.57 (1.32-1.88) | 5.10E-07 | 159 15  | 12    |          |          |                 |       |       |
|             |    |         |     |    | TT | 1.45 (0.60-3.52) | 0.41     | 5 1     | 21.33 |          |          |                 |       |       |
|             |    |         |     |    | CC | 0.60 (0.49-0.74) | 8.40E-07 | 180 34  | 18.43 |          |          |                 |       |       |
| rs34478259  | 8  | ZHX2    | T>G | 7  | GG | 1.00             | -        | 586 102 | 15.57 | 1.40E-03 | 8.30E-07 | FullImputed     | 0.865 | 0.017 |
|             |    |         |     |    | GT | 1.57 (1.32-1.88) | 5.10E-07 | 159 15  | 12    |          |          |                 |       |       |
|             |    |         |     |    | TT | 1.45 (0.60-3.52) | 0.41     | 5 1     | 21.33 |          |          |                 |       |       |
|             |    |         |     |    | CC | 0.60 (0.49-0.74) | 8.40E-07 | 180 34  | 18.43 |          |          |                 |       |       |
| rs35098046  | 2  |         | T>G | 7  | GG | 1.00             | -        | 717 117 | 14.93 | 4.80E-04 | 8.50E-07 | FullImputed     | 0.871 | 0.017 |
|             |    |         |     |    | GT | 2.43 (1.71-3.46) | 8.50E-07 | 33 1    | 9.67  |          |          |                 |       |       |
|             |    |         |     |    | TT | -                | -        | 0       | 0     |          |          |                 |       |       |
|             |    |         |     |    | AA | 1.00             | -        | 717 117 | 14.93 |          |          |                 |       |       |
| rs34022557  | 2  | MCEE    | G>A | 7  | AG | 2.43 (1.71-3.46) | 8.50E-07 | 33 1    | 9.67  | 4.80E-04 | 8.50E-07 | FullImputed     | 0.871 | 0.017 |
|             |    |         |     |    | GG | -                | -        | 0       | 0     |          |          |                 |       |       |
|             |    |         |     |    | TT | -                | -        | 0       | 0     |          |          |                 |       |       |
|             |    |         |     |    | AA | 1.00             | -        | 717 117 | 14.93 |          |          |                 |       |       |
| rs75068379  | 9  |         | C>T | 7  | TT | 1.00             | -        | 721 118 | 14.83 | 4.80E-04 | 8.50E-07 | FullImputed     | 0.775 | 0.014 |
|             |    |         |     |    | GG | -                | -        | 0       | 0     |          |          |                 |       |       |

|             |    |          |     |    |                  |                    |          |         |          |          |          |                 |       |       |
|-------------|----|----------|-----|----|------------------|--------------------|----------|---------|----------|----------|----------|-----------------|-------|-------|
|             |    |          |     | TC | 2.57 (1.77-3.75) | 8.70E-07           | 29 0     | 8.97    |          |          |          |                 |       |       |
|             |    |          |     | CC | -                | -                  | 0        |         | 4.00E-05 | 8.70E-07 |          |                 |       |       |
| rs71595738  | 4  |          | G>A | 5  | AA               | 1.00               | -        | 686 113 | 15.07    |          |          | FullImputed     | 0.465 | 0.071 |
|             |    |          |     |    | AG               | 1.85 (1.42-2.41)   | 5.50E-06 | 62 5    | 10.1     |          |          |                 |       |       |
|             |    |          |     |    | GG               | 4.54 (1.12-18.36)  | 0.034    | 2 0     | 6.48     | 2.70E-05 | 9.20E-07 |                 |       |       |
| rs149094051 | 4  |          | G>C | 7  | CC               | 1.00               | -        | 732 118 | 14.87    |          |          | FullImputed     | 0.658 | 0.014 |
|             |    |          |     |    | CG               | 3.32 (2.05-5.36)   | 9.50E-07 | 18 0    | 7.47     |          |          |                 |       |       |
|             |    |          |     |    | GG               | -                  | -        | 0       |          | 2.40E-07 | 9.50E-07 |                 |       |       |
| rs4568126   | 3  | B4GALT4  | C>A | 6  | AA               | 1.00               | -        | 266 35  | 13.7     |          |          | ImputedInPanSca | 0.989 | 0.421 |
|             |    |          |     |    | AC               | 0.85 (0.72-0.99)   | 0.042    | 361 53  | 14.3     |          |          |                 |       |       |
|             |    |          |     |    | CC               | 0.58 (0.47-0.72)   | 6.80E-07 | 123 30  | 18.3     | 2.00E-04 | 9.90E-07 |                 |       |       |
| rs72821416  | 10 | SLK      | T>C | 5  | CC               | 1.00               | -        | 687 116 | 15.07    |          |          | FullImputed     | 0.714 | 0.044 |
|             |    |          |     |    | CT               | 1.92 (1.48-2.50)   | 1.00E-06 | 63 2    | 10.37    |          |          |                 |       |       |
|             |    |          |     |    | TT               | -                  | -        | 0       |          | 2.00E-05 | 1.00E-06 |                 |       |       |
| rs75129701  | 11 | KIAA1731 | A>C | 7  | CC               | 1.00               | -        | 677 113 | 15.07    |          |          | FullImputed     | 0.725 | 0.041 |
|             |    |          |     |    | CA               | 1.88 (1.47-2.40)   | 4.50E-07 | 72 5    | 10.77    |          |          |                 |       |       |
|             |    |          |     |    | AA               | 1.17 (0.16-8.36)   | 0.88     | 1 0     | 18.77    | 9.80E-03 | 1.00E-06 |                 |       |       |
| rs34634781  | 2  |          | A>G | 7  | GG               | 1.00               | -        | 718 117 | 14.93    |          |          | FullImputed     | 0.89  | 0.017 |
|             |    |          |     |    | GA               | 2.44 (1.70-3.49)   | 1.10E-06 | 32 1    | 9.67     |          |          |                 |       |       |
|             |    |          |     |    | AA               | -                  | -        | 0       |          | 4.00E-04 | 1.10E-06 |                 |       |       |
| rs12988407  | 2  |          | C>G | 7  | GG               | 1.00               | -        | 366 73  | 17.17    |          |          | FullImputed     | 0.899 | 0.287 |
|             |    |          |     |    | GC               | 1.29 (1.11-1.50)   | 0.00087  | 327 42  | 13.07    |          |          |                 |       |       |
|             |    |          |     |    | CC               | 1.93 (1.45-2.56)   | 7.00E-06 | 57 3    | 9.8      | 8.60E-05 | 1.10E-06 |                 |       |       |
| rs6780425   | 3  | ZBTB20   | T>A | 6  | AA               | 1.00               | -        | 492 93  | 15.8     |          |          | FullImputed     | 0.996 | 0.834 |
|             |    |          |     |    | AT               | 1.44 (1.23-1.70)   | 7.40E-06 | 234 22  | 13.9     |          |          |                 |       |       |
|             |    |          |     |    | TT               | 1.72 (1.14-2.61)   | 0.01     | 24 3    | 10.5     | 5.90E-03 | 1.10E-06 |                 |       |       |
| rs6438217   | 3  | ZBTB20   | T>C | 6  | CC               | 1.00               | -        | 492 93  | 15.5     |          |          | FullImputed     | 0.998 | 0.834 |
|             |    |          |     |    | CT               | 1.44 (1.23-1.70)   | 7.40E-06 | 234 22  | 13.7     |          |          |                 |       |       |
|             |    |          |     |    | TT               | 1.72 (1.14-2.61)   | 0.01     | 24 3    | 10.5     | 5.90E-03 | 1.10E-06 |                 |       |       |
| rs76288321  | 4  | C4orf21  | G>T | 7  | TT               | 1.00               | -        | 730 118 | 14.83    |          |          | FullImputed     | 0.897 | 0.013 |
|             |    |          |     |    | TG               | 3.48 (2.11-5.76)   | 1.10E-06 | 20 0    | 7.02     |          |          |                 |       |       |
|             |    |          |     |    | GG               | -                  | -        | 0       |          | 4.40E-07 | 1.10E-06 |                 |       |       |
| rs77404356  | 4  | LARP7    | G>A | 2b | AA               | 1.00               | -        | 731 118 | 14.83    |          |          | FullImputed     | 0.888 | 0.013 |
|             |    |          |     |    | AG               | 3.49 (2.11-5.76)   | 1.10E-06 | 19 0    | 6.83     |          |          |                 |       |       |
|             |    |          |     |    | GG               | -                  | -        | 0       |          | 4.20E-07 | 1.10E-06 |                 |       |       |
| rs139456100 | 13 |          | X>G | 6  | GG               | 1.00               | -        | 698 115 | 14.87    |          |          | FullImputed     | 0.906 | 0.033 |
|             |    |          |     |    | GX               | 1.89 (1.41-2.53)   | 1.90E-05 | 50 3    | 10.73    |          |          |                 |       |       |
|             |    |          |     |    | XX               | 13.24 (3.27-53.60) | 3.00E-04 | 2 0     | 4.93     | 1.20E-04 | 1.10E-06 |                 |       |       |
| rs1274217   | 3  | ZBTB20   | A>C | 6  | CC               | 1.00               | -        | 502 94  | 15.73    |          |          | FullImputed     | 0.998 | 0.164 |
|             |    |          |     |    | CA               | 1.45 (1.23-1.70)   | 6.70E-06 | 225 21  | 13.9     |          |          |                 |       |       |
|             |    |          |     |    | AA               | 1.70 (1.11-2.59)   | 0.014    | 23 3    | 8.6      | 9.60E-03 | 1.20E-06 |                 |       |       |
| rs1274222   | 3  | ZBTB20   | T>C | 7  | CC               | 1.00               | -        | 502 94  | 15.73    |          |          | FullImputed     | 0.998 | 0.164 |
|             |    |          |     |    | CT               | 1.45 (1.23-1.70)   | 6.70E-06 | 225 21  | 13.9     |          |          |                 |       |       |
|             |    |          |     |    | TT               | 1.70 (1.11-2.59)   | 0.014    | 23 3    | 8.6      | 9.60E-03 | 1.20E-06 |                 |       |       |
| rs1298330   | 3  | ZBTB20   | G>C | 5  | CC               | 1.00               | -        | 502 94  | 15.73    |          |          | FullImputed     | 0.998 | 0.164 |
|             |    |          |     |    | CG               | 1.45 (1.23-1.70)   | 6.70E-06 | 225 21  | 13.9     |          |          |                 |       |       |
|             |    |          |     |    | GG               | 1.70 (1.11-2.59)   | 0.014    | 23 3    | 8.6      | 9.60E-03 | 1.20E-06 |                 |       |       |
| rs4643703   | 3  | B4GALT4  | T>C | 1b | CC               | 1.00               | -        | 269 35  | 13.8     |          |          | FullImputed     | 0.998 | 0.419 |
|             |    |          |     |    | CT               | 0.86 (0.74-1.01)   | 0.069    | 359 53  | 14.07    |          |          |                 |       |       |
|             |    |          |     |    | TT               | 0.58 (0.47-0.72)   | 6.50E-07 | 122 30  | 20       | 1.60E-04 | 1.20E-06 |                 |       |       |
| rs78566266  | 3  |          | T>C | 5  | CC               | 1.00               | -        | 700 116 | 14.87    |          |          | FullImputed     | 0.386 | 0.029 |

|             |    |         |     |   |    |                   |          |         |       |          |          |             |       |       |
|-------------|----|---------|-----|---|----|-------------------|----------|---------|-------|----------|----------|-------------|-------|-------|
| rs115836230 | 6  | HCG17   | C>T | - | CT | 1.96 (1.47-2.63)  | 6.50E-06 | 49 2    | 10.97 | 0.00E+00 | 1.20E-06 | FullImputed | 0.663 | 0.136 |
|             |    |         |     |   | TT | 1.26 (35.85-2702) | 1.90E-07 | 1 0     | 0.83  |          |          |             |       |       |
|             |    |         |     |   | TT | 1.00              | -        | 612 87  | 14.07 |          |          |             |       |       |
|             |    |         |     |   | TC | 0.65 (0.54-0.79)  | 1.40E-05 | 128 28  | 16.57 |          |          |             |       |       |
| rs37575     | 5  | PDE4D   | A>T | 7 | CC | 0.45 (0.24-0.84)  | 0.013    | 10 3    | 27.03 | 1.20E-02 | 1.20E-06 | FullImputed | 0.988 | 0.318 |
|             |    |         |     |   | TT | 1.00              | -        | 352 38  | 12.37 |          |          |             |       |       |
|             |    |         |     |   | TA | 0.71 (0.61-0.82)  | 5.70E-06 | 328 62  | 15.8  |          |          |             |       |       |
|             |    |         |     |   | AA | 0.63 (0.49-0.81)  | 0.00032  | 70 18   | 18.33 |          |          |             |       |       |
| rs72943208  | 11 | MTL5    | G>A | 7 | AA | 1.00              | -        | 586 103 | 15.33 | 3.10E-04 | 1.30E-06 | FullImputed | 0.997 | 0.108 |
|             |    |         |     |   | AG | 1.42 (1.18-1.70)  | 0.00016  | 152 15  | 12.6  |          |          |             |       |       |
|             |    |         |     |   | GG | 3.17 (1.78-5.65)  | 9.40E-05 | 12 0    | 9.08  |          |          |             |       |       |
|             |    |         |     |   | XX | 1.00              | -        | 584 103 | 15.33 |          |          |             |       |       |
| rs79508772  | 11 | MTL5    | T>X | - | XT | 1.42 (1.18-1.70)  | 0.00015  | 154 15  | 12.63 | 5.70E-06 | 1.30E-06 | FullImputed | 0.998 | 0.108 |
|             |    |         |     |   | TT | 3.17 (1.78-5.66)  | 9.30E-05 | 12 0    | 9.08  |          |          |             |       |       |
|             |    |         |     |   | AA | 1.00              | -        | 278 38  | 13.37 |          |          |             |       |       |
|             |    |         |     |   | AC | 0.86 (0.73-1.01)  | 0.062    | 350 51  | 14.3  |          |          |             |       |       |
| rs62265180  | 3  | B4GALT4 | C>A | 7 | CC | 0.58 (0.47-0.72)  | 8.20E-07 | 122 29  | 20    | 3.90E-04 | 1.40E-06 | FullImputed | 0.997 | 0.412 |
|             |    |         |     |   | GG | 1.00              | -        | 588 103 | 15.33 |          |          |             |       |       |
|             |    |         |     |   | GC | 1.42 (1.18-1.70)  | 0.00017  | 150 15  | 12.6  |          |          |             |       |       |
|             |    |         |     |   | CC | 3.17 (1.78-5.65)  | 9.40E-05 | 12 0    | 9.08  |          |          |             |       |       |
| rs3181041   | 11 |         | C>G | 4 | TT | 1.00              | -        | 425 80  | 16.27 | 4.00E-06 | 1.40E-06 | FullImputed | 0.996 | 0.106 |
|             |    |         |     |   | TC | 1.31 (1.13-1.53)  | 0.00042  | 284 35  | 13.13 |          |          |             |       |       |
|             |    |         |     |   | CC | 1.96 (1.42-2.72)  | 4.60E-05 | 41 3    | 10.65 |          |          |             |       |       |
|             |    |         |     |   | TT | 1.00              | -        | 713 116 | 15.03 |          |          |             |       |       |
| rs8107839   | 19 |         | C>T | 6 | TC | 2.27 (1.62-3.17)  | 1.50E-06 | 37 2    | 8.9   | 8.10E-05 | 1.50E-06 | FullImputed | 0.899 | 0.029 |
|             |    |         |     |   | CC | -                 | -        | 0       |       |          |          |             |       |       |
|             |    |         |     |   | CC | 1.00              | -        | 203 36  | 17.9  |          |          |             |       |       |
|             |    |         |     |   | CT | 1.35 (1.13-1.60)  | 0.00066  | 372 55  | 14.07 |          |          |             |       |       |
| rs62268876  | 3  | SLC9A9  | C>T | 7 | TT | 1.64 (1.33-2.01)  | 2.80E-06 | 175 27  | 12.67 | 2.10E-02 | 1.70E-06 | FullImputed | 0.994 | 0.028 |
|             |    |         |     |   | GG | 1.00              | -        | 698 118 | 15.03 |          |          |             |       |       |
|             |    |         |     |   | GA | 1.99 (1.49-2.66)  | 3.60E-06 | 51 0    | 10.27 |          |          |             |       |       |
|             |    |         |     |   | AA | 4.31 (0.57-32.44) | 0.16     | 1 0     | 4.43  |          |          |             |       |       |
| rs1010527   | 5  |         | A>G | 6 | GG | 1.00              | -        | 698 118 | 15.03 | 1.00E-06 | 1.70E-06 | FullImputed | 0.994 | 0.028 |
|             |    |         |     |   | GA | 1.99 (1.49-2.66)  | 3.60E-06 | 51 0    | 10.27 |          |          |             |       |       |
|             |    |         |     |   | AA | 4.31 (0.57-32.44) | 0.16     | 1 0     | 4.43  |          |          |             |       |       |
|             |    |         |     |   | TT | 1.00              | -        | 698 118 | 15.03 |          |          |             |       |       |
| rs6883519   | 5  |         | T>G | 7 | GT | 1.99 (1.49-2.66)  | 3.60E-06 | 51 0    | 10.27 | 1.00E-06 | 1.70E-06 | FullImputed | 0.994 | 0.028 |
|             |    |         |     |   | TT | 4.31 (0.57-32.44) | 0.16     | 1 0     | 4.43  |          |          |             |       |       |
|             |    |         |     |   | GG | 1.00              | -        | 698 118 | 15.03 |          |          |             |       |       |
|             |    |         |     |   | GT | 1.99 (1.49-2.66)  | 3.60E-06 | 51 0    | 10.27 |          |          |             |       |       |
| rs6888256   | 5  |         | T>G | 6 | TT | 4.31 (0.57-32.44) | 0.16     | 1 0     | 4.43  | 1.00E-06 | 1.70E-06 | FullImputed | 0.995 | 0.028 |
|             |    |         |     |   | GG | 1.00              | -        | 698 118 | 15.03 |          |          |             |       |       |
|             |    |         |     |   | GT | 1.99 (1.49-2.66)  | 3.60E-06 | 51 0    | 10.27 |          |          |             |       |       |
|             |    |         |     |   | TT | 4.31 (0.57-32.44) | 0.16     | 1 0     | 4.43  |          |          |             |       |       |
| rs1992711   | 5  |         | G>A | 4 | AA | 1.00              | -        | 698 118 | 15.03 | 1.00E-06 | 1.70E-06 | Genotyped   | 1     | 0.028 |
|             |    |         |     |   | AG | 1.99 (1.49-2.66)  | 3.60E-06 | 51 0    | 10.27 |          |          |             |       |       |
|             |    |         |     |   | GG | 4.31 (0.57-32.44) | 0.16     | 1 0     | 4.43  |          |          |             |       |       |
|             |    |         |     |   | CC | 1.00              | -        | 698 118 | 15.03 |          |          |             |       |       |
| rs6861190   | 5  |         | A>C | 7 | CA | 1.99 (1.49-2.66)  | 3.60E-06 | 51 0    | 10.27 | 1.00E-06 | 1.70E-06 | FullImputed | 0.997 | 0.028 |
|             |    |         |     |   | AA | 4.31 (0.57-32.44) | 0.16     | 1 0     | 4.43  |          |          |             |       |       |
|             |    |         |     |   | GG | 1.00              | -        | 698 118 | 15.03 |          |          |             |       |       |
|             |    |         |     |   | GA | 1.99 (1.49-2.66)  | 3.60E-06 | 51 0    | 10.27 |          |          |             |       |       |
| rs2020105   | 5  |         | A>G | 6 | AA | 4.31 (0.57-32.44) | 0.16     | 1 0     | 4.43  | 1.00E-06 | 1.70E-06 | FullImputed | 0.996 | 0.028 |
|             |    |         |     |   | GG | 1.00              | -        | 698 118 | 15.03 |          |          |             |       |       |
|             |    |         |     |   | GA | 1.99 (1.49-2.66)  | 3.60E-06 | 51 0    | 10.27 |          |          |             |       |       |
|             |    |         |     |   | AA | 4.31 (0.57-32.44) | 0.16     | 1 0     | 4.43  |          |          |             |       |       |
| rs116664242 | 6  | HCG17   | C>T | - | TT | 1.00              | -        | 609 87  | 14.07 | 9.50E-03 | 1.70E-06 | FullImputed | 0.655 | 0.141 |
|             |    |         |     |   | TC | 0.66 (0.55-0.80)  | 1.90E-05 | 131 28  | 16.63 |          |          |             |       |       |
|             |    |         |     |   | CC | 0.45 (0.24-0.85)  | 0.013    | 10 3    | 27.03 |          |          |             |       |       |
|             |    |         |     |   | CC | 1.00              | -        | 634 110 | 15.07 |          |          |             |       |       |
| rs58084587  | 2  |         | C>C | - | CC | 1.00              | -        | 634 110 | 15.07 |          |          | FullImputed | 0.828 | 0.939 |

|             |    |         |     |    |      |                   |          |         |    |       |          |          |                 |       |       |
|-------------|----|---------|-----|----|------|-------------------|----------|---------|----|-------|----------|----------|-----------------|-------|-------|
|             |    |         |     |    | CCG  | 1.52 (1.24-1.86)  | 6.90E-05 | 109 8   | G  | 11.33 |          |          |                 |       |       |
|             |    |         |     |    | CGCG | 4.77 (2.00-11.35) | 0.00042  | 7 0     | CG | 7.23  | 2.50E-05 | 1.80E-06 |                 |       |       |
| rs37572     | 5  | PDE4D   | A>T | 5  | TT   | 1.00              | -        | 351 38  |    | 12.57 |          |          | FullImputed     | 0.984 | 0.32  |
|             |    |         |     |    | TA   | 0.71 (0.61-0.82)  | 6.90E-06 | 328 61  |    | 15.8  |          |          |                 |       |       |
|             |    |         |     |    | AA   | 0.63 (0.49-0.82)  | 0.00039  | 71 19   |    | 18.33 | 3.70E-04 | 1.80E-06 |                 |       |       |
| rs4731081   | 7  |         | G>T | 6  | TT   | 1.00              | -        | 191 40  |    | 17.9  |          |          | FullImputed     | 0.8   | 0.541 |
|             |    |         |     |    | TG   | 1.19 (1.00-1.42)  | 0.048    | 376 61  |    | 15.03 |          |          |                 |       |       |
|             |    |         |     |    | GG   | 1.67 (1.36-2.04)  | 1.00E-06 | 183 17  |    | 12.13 | 5.80E-05 | 1.80E-06 |                 |       |       |
| rs3136546   | 11 |         | G>A | 5  | AA   | 1.00              | -        | 590 103 |    | 15.33 |          |          | ImputedInPanSca | 0.966 | 0.105 |
|             |    |         |     |    | AG   | 1.41 (1.18-1.70)  | 0.00021  | 148 15  |    | 12.6  |          |          |                 |       |       |
|             |    |         |     |    | GG   | 3.16 (1.77-5.64)  | 9.70E-05 | 12 0    |    | 9.08  | 5.00E-06 | 1.80E-06 |                 |       |       |
| rs8108975   | 19 |         | T>C | 6  | CC   | 1.00              | -        | 424 80  |    | 16.27 |          |          | FullImputed     | 0.894 | 0.245 |
|             |    |         |     |    | CT   | 1.32 (1.13-1.53)  | 0.00033  | 286 35  |    | 13.13 |          |          |                 |       |       |
|             |    |         |     |    | TT   | 1.92 (1.38-2.67)  | 9.60E-05 | 40 3    |    | 10.67 | 1.50E-03 | 1.80E-06 |                 |       |       |
| rs2866469   | 3  | B4GALT4 | C>T | 5  | TT   | 1.00              | -        | 276 38  |    | 13.47 |          |          | FullImputed     | 0.997 | 0.413 |
|             |    |         |     |    | TC   | 0.87 (0.74-1.02)  | 0.077    | 352 51  |    | 14.2  |          |          |                 |       |       |
|             |    |         |     |    | CC   | 0.59 (0.47-0.73)  | 1.00E-06 | 122 29  |    | 20    | 4.80E-04 | 1.90E-06 |                 |       |       |
| rs10934487  | 3  | B4GALT4 | C>A | 7  | AA   | 1.00              | -        | 259 34  |    | 13.37 |          |          | FullImputed     | 0.997 | 0.422 |
|             |    |         |     |    | AC   | 0.83 (0.71-0.97)  | 0.02     | 360 55  |    | 14.6  |          |          |                 |       |       |
|             |    |         |     |    | CC   | 0.60 (0.49-0.74)  | 2.10E-06 | 131 29  |    | 18.4  | 6.30E-04 | 2.00E-06 |                 |       |       |
| rs37576     | 5  | PDE4D   | T>C | 7  | CC   | 1.00              | -        | 347 38  |    | 12.37 |          |          | ImputedInPanSca | 0.944 | 0.33  |
|             |    |         |     |    | CT   | 0.71 (0.61-0.82)  | 7.60E-06 | 327 61  |    | 15.73 |          |          |                 |       |       |
|             |    |         |     |    | TT   | 0.64 (0.50-0.82)  | 0.00033  | 76 19   |    | 18.4  | 3.20E-04 | 2.00E-06 |                 |       |       |
| rs191219903 | 10 | SLC29A3 | G>T | 5  | TT   | 1.00              | -        | 655 110 |    | 15.17 |          |          | FullImputed     | 0.552 | 0.087 |
|             |    |         |     |    | TG   | 1.59 (1.28-1.98)  | 3.50E-05 | 91 8    |    | 11.4  |          |          |                 |       |       |
|             |    |         |     |    | GG   | 4.54 (1.68-12.24) | 0.0028   | 4 0     |    | 13.2  | 5.30E-04 | 2.10E-06 |                 |       |       |
| rs3856531   | 2  |         | C>T | 4  | TT   | 1.00              | -        | 379 74  |    | 17.1  |          |          | ImputedInPanC   | 1     | 0.266 |
|             |    |         |     |    | TC   | 1.31 (1.13-1.52)  | 0.00043  | 320 41  |    | 12.97 |          |          |                 |       |       |
|             |    |         |     |    | CC   | 1.82 (1.36-2.45)  | 6.80E-05 | 51 3    |    | 9.83  | 2.90E-04 | 2.20E-06 |                 |       |       |
| rs76754799  | 4  | FAM53A  | G>A | 5  | AA   | 1.00              | -        | 725 118 |    | 14.87 |          |          | FullImputed     | 0.581 | 0.014 |
|             |    |         |     |    | AG   | 2.66 (1.77-3.98)  | 2.20E-06 | 25 0    |    | 8.23  |          |          |                 |       |       |
|             |    |         |     |    | GG   | -                 | -        | 0       |    |       | 1.80E-05 | 2.20E-06 |                 |       |       |
| rs115634566 | 4  | FAM53A  | G>C | 5  | CC   | 1.00              | -        | 725 118 |    | 14.87 |          |          | FullImputed     | 0.587 | 0.014 |
|             |    |         |     |    | CG   | 2.66 (1.77-3.98)  | 2.20E-06 | 25 0    |    | 8.23  |          |          |                 |       |       |
|             |    |         |     |    | GG   | -                 | -        | 0       |    |       | 1.80E-05 | 2.20E-06 |                 |       |       |
| rs11255570  | 10 |         | A>G | 7  | GG   | 1.00              | -        | 696 111 |    | 14.93 |          |          | FullImputed     | 0.938 | 0.036 |
|             |    |         |     |    | GA   | 1.78 (1.34-2.38)  | 8.20E-05 | 50 7    |    | 9.73  |          |          |                 |       |       |
|             |    |         |     |    | AA   | 4.48 (1.66-12.10) | 0.0031   | 4 0     |    | 6.67  | 4.90E-04 | 2.20E-06 |                 |       |       |
| rs11255571  | 10 |         | A>T | 7  | TT   | 1.00              | -        | 696 111 |    | 14.93 |          |          | FullImputed     | 0.938 | 0.036 |
|             |    |         |     |    | TA   | 1.78 (1.34-2.38)  | 8.20E-05 | 50 7    |    | 9.73  |          |          |                 |       |       |
|             |    |         |     |    | AA   | 4.48 (1.66-12.10) | 0.0031   | 4 0     |    | 6.67  | 4.90E-04 | 2.20E-06 |                 |       |       |
| rs6432289   | 2  |         | A>G | 7  | GG   | 1.00              | -        | 155 36  |    | 16.87 |          |          | FullImputed     | 0.555 | 0.51  |
|             |    |         |     |    | GA   | 1.43 (1.19-1.72)  | 0.00014  | 428 61  |    | 14.87 |          |          |                 |       |       |
|             |    |         |     |    | AA   | 1.68 (1.35-2.09)  | 3.40E-06 | 167 21  |    | 12.57 | 2.30E-02 | 2.30E-06 |                 |       |       |
| rs12610476  | 19 |         | C>T | 5  | TT   | 1.00              | -        | 418 79  |    | 16.27 |          |          | ImputedInPanC   | 0.829 | 0.25  |
|             |    |         |     |    | TC   | 1.27 (1.09-1.48)  | 0.0018   | 287 37  |    | 13.43 |          |          |                 |       |       |
|             |    |         |     |    | CC   | 2.02 (1.48-2.76)  | 9.00E-06 | 45 2    |    | 11.27 | 7.20E-04 | 2.30E-06 |                 |       |       |
| rs3840489   | 3  | B4GALT4 | C>X | 4  | XX   | 1.00              | -        | 264 34  |    | 13.37 |          |          | FullImputed     | 0.996 | 0.422 |
|             |    |         |     |    | XC   | 0.84 (0.72-0.98)  | 0.03     | 359 55  |    | 14.77 |          |          |                 |       |       |
|             |    |         |     |    | CC   | 0.60 (0.48-0.74)  | 2.10E-06 | 127 29  |    | 18.4  | 3.50E-04 | 2.40E-06 |                 |       |       |
| rs142005054 | 11 |         | X>A | 3a | AA   | 1.00              | -        | 590 104 |    | 15.3  |          |          | FullImputed     | 0.978 | 0.105 |

|             |    |          |     |    |                   |          |         |       |          |          |             |       |       |
|-------------|----|----------|-----|----|-------------------|----------|---------|-------|----------|----------|-------------|-------|-------|
| rs78809173  | 14 | C>T      | 3a  | AX | 1.42 (1.18-1.70)  | 0.00016  | 149 14  | 12.63 | 1.40E-05 | 2.40E-06 | FullImputed | 0.776 | 0.015 |
|             |    |          |     | XX | 3.02 (1.65-5.52)  | 0.00033  | 11 0    | 9.63  |          |          |             |       |       |
|             |    |          |     | TT | 1.00              | -        | 721 118 | 14.93 |          |          |             |       |       |
|             |    |          |     | TC | 2.49 (1.71-3.64)  | 2.40E-06 | 29 0    | 10.5  |          |          |             |       |       |
| rs78044233  | 1  | C>T      | 6   | CC | -                 | -        | 0       |       | 4.70E-06 | 2.40E-06 | FullImputed | 0.845 | 0.474 |
|             |    |          |     | TT | 1.00              | -        | 190 32  | 17.6  |          |          |             |       |       |
|             |    |          |     | TC | 1.23 (1.03-1.46)  | 0.023    | 368 59  | 14.83 |          |          |             |       |       |
| rs76187045  | 1  | A>G      | 7   | CC | 1.64 (1.34-2.01)  | 1.90E-06 | 192 27  | 12.5  | 1.40E-02 | 2.50E-06 | FullImputed | 0.845 | 0.474 |
|             |    |          |     | GG | 1.00              | -        | 190 32  | 17.6  |          |          |             |       |       |
|             |    |          |     | GA | 1.23 (1.03-1.46)  | 0.023    | 368 59  | 14.83 |          |          |             |       |       |
| rs71638317  | 1  | SMYD3    | C>T | AA | 1.64 (1.34-2.01)  | 1.90E-06 | 192 27  | 12.5  | 1.40E-02 | 2.50E-06 | FullImputed | 0.746 | 0.022 |
|             |    |          |     | TT | 1.00              | -        | 720 117 | 14.77 |          |          |             |       |       |
|             |    |          |     | TC | 2.11 (1.44-3.09)  | 0.00014  | 28 1    | 10.97 |          |          |             |       |       |
| rs34830715  | 9  | FAM189A2 | T>A | CC | 3.26 (5.66-95.63) | 1.30E-05 | 2 0     | 3.82  | 4.20E-06 | 2.50E-06 | FullImputed | 0.681 | 0.022 |
|             |    |          |     | AA | 1.00              | -        | 717 115 | 14.87 |          |          |             |       |       |
|             |    |          |     | AT | 2.31 (1.63-3.28)  | 2.50E-06 | 33 3    | 9.93  |          |          |             |       |       |
| rs62462729  | 7  | A>G      | 7   | TT | -                 | -        | 0       |       | 4.10E-03 | 2.50E-06 | FullImputed | 0.907 | 0.152 |
|             |    |          |     | GG | 1.00              | -        | 521 97  | 15.57 |          |          |             |       |       |
|             |    |          |     | GA | 1.34 (1.14-1.57)  | 3.00E-04 | 216 20  | 13.9  |          |          |             |       |       |
| rs12186112  | 3  | UPK1B    | A>C | AA | 3.47 (1.99-6.05)  | 1.10E-05 | 13 1    | 5.38  | 2.50E-04 | 2.60E-06 | FullImputed | 0.989 | 0.405 |
|             |    |          |     | CC | 1.00              | -        | 286 40  | 12.4  |          |          |             |       |       |
|             |    |          |     | CA | 0.84 (0.72-0.98)  | 0.028    | 342 52  | 14.6  |          |          |             |       |       |
| rs11707454  | 3  | G>T      | 7   | AA | 0.60 (0.48-0.74)  | 2.60E-06 | 122 26  | 18.2  | 1.20E-03 | 2.70E-06 | FullImputed | 0.718 | 0.05  |
|             |    |          |     | TT | 1.00              | -        | 686 113 | 15.03 |          |          |             |       |       |
|             |    |          |     | TG | 1.86 (1.44-2.41)  | 2.70E-06 | 64 5    | 10.97 |          |          |             |       |       |
| rs76100990  | 5  | COL23A1  | A>G | GG | -                 | -        | 0       |       | 1.10E-03 | 2.70E-06 | FullImputed | 0.817 | 0.014 |
|             |    |          |     | GG | 1.00              | -        | 723 117 | 14.83 |          |          |             |       |       |
|             |    |          |     | GA | 2.54 (1.72-3.75)  | 2.70E-06 | 27 1    | 9.7   |          |          |             |       |       |
| rs6986513   | 8  | T>C      | 4   | AA | -                 | -        | 0       |       | 9.60E-04 | 2.70E-06 | FullImputed | 0.99  | 0.438 |
|             |    |          |     | CC | 1.00              | -        | 249 32  | 12.83 |          |          |             |       |       |
|             |    |          |     | CT | 0.75 (0.64-0.88)  | 0.00052  | 361 58  | 14.53 |          |          |             |       |       |
| rs142441596 | 9  | PTPRD    | G>A | TT | 0.62 (0.50-0.76)  | 5.40E-06 | 140 28  | 18.67 | 1.20E-02 | 2.70E-06 | FullImputed | 0.776 | 0.016 |
|             |    |          |     | AA | 1.00              | -        | 729 116 | 14.83 |          |          |             |       |       |
|             |    |          |     | AG | 2.81 (1.82-4.32)  | 2.70E-06 | 21 2    | 8.3   |          |          |             |       |       |
| rs9311811   | 3  | A>G      | 7   | GG | -                 | -        | 0       |       | 8.70E-04 | 2.70E-06 | Genotyped   | 1     | 0.478 |
|             |    |          |     | GG | 1.00              | -        | 207 34  | 17.33 |          |          |             |       |       |
|             |    |          |     | GA | 1.31 (1.10-1.55)  | 0.002    | 368 58  | 13.9  |          |          |             |       |       |
| rs9816766   | 3  | C>T      | 5   | AA | 1.62 (1.32-1.99)  | 3.90E-06 | 175 26  | 13.43 | 2.30E-01 | 2.80E-06 | FullImputed | 0.999 | 0.478 |
|             |    |          |     | TT | 1.00              | -        | 207 34  | 17.33 |          |          |             |       |       |
|             |    |          |     | TC | 1.31 (1.10-1.55)  | 0.002    | 368 58  | 13.9  |          |          |             |       |       |
| rs967328    | 3  | T>C      | 7   | CC | 1.62 (1.32-1.99)  | 3.90E-06 | 175 26  | 13.43 | 2.30E-01 | 2.80E-06 | FullImputed | 0.998 | 0.479 |
|             |    |          |     | CC | 1.00              | -        | 206 34  | 17.33 |          |          |             |       |       |
|             |    |          |     | CT | 1.32 (1.11-1.56)  | 0.0015   | 368 58  | 13.9  |          |          |             |       |       |
| rs9828065   | 3  | G>A      | 7   | TT | 1.62 (1.32-1.99)  | 4.10E-06 | 176 26  | 13.43 | 2.10E-01 | 2.80E-06 | FullImputed | 0.913 | 0.011 |
|             |    |          |     | AA | 1.00              | -        | 735 118 | 14.83 |          |          |             |       |       |
|             |    |          |     | AG | 3.45 (2.06-5.80)  | 2.80E-06 | 15 0    | 9.33  |          |          |             |       |       |
| rs9824955   | 3  | G>A      | 7   | GG | -                 | -        | 0       |       | 2.70E-05 | 2.80E-06 | FullImputed | 0.912 | 0.011 |
|             |    |          |     | AA | 1.00              | -        | 735 118 | 14.83 |          |          |             |       |       |
|             |    |          |     | AG | 3.45 (2.06-5.80)  | 2.80E-06 | 15 0    | 9.33  |          |          |             |       |       |
| rs9830946   | 3  | A>G      | 7   | GG | -                 | -        | 0       |       | 2.70E-05 | 2.80E-06 | FullImputed | 0.914 | 0.011 |
|             |    |          |     | GG | 1.00              | -        | 735 118 | 14.83 |          |          |             |       |       |

|             |    |     |    |    |                   |          |         |       |          |          |             |       |       |
|-------------|----|-----|----|----|-------------------|----------|---------|-------|----------|----------|-------------|-------|-------|
| rs138888411 | 3  | A>G | 7  | GA | 3.45 (2.06-5.80)  | 2.80E-06 | 15 0    | 9.33  | 2.70E-05 | 2.80E-06 | FullImputed | 0.914 | 0.011 |
|             |    |     |    | AA | -                 | -        | 0       |       |          |          |             |       |       |
|             |    |     |    | GG | 1.00              | -        | 735 118 | 14.83 |          |          |             |       |       |
| rs76554406  | 3  | T>C | 5  | GA | 3.45 (2.06-5.80)  | 2.80E-06 | 15 0    | 9.33  | 2.70E-05 | 2.80E-06 | FullImputed | 0.914 | 0.011 |
|             |    |     |    | AA | -                 | -        | 0       |       |          |          |             |       |       |
|             |    |     |    | CC | 1.00              | -        | 735 118 | 14.83 |          |          |             |       |       |
| rs144611748 | 3  | G>C | 7  | CT | 3.45 (2.06-5.80)  | 2.80E-06 | 15 0    | 9.33  | 2.70E-05 | 2.80E-06 | FullImputed | 0.913 | 0.011 |
|             |    |     |    | TT | -                 | -        | 0       |       |          |          |             |       |       |
|             |    |     |    | CC | 1.00              | -        | 735 118 | 14.83 |          |          |             |       |       |
| rs111352587 | 11 | G>A | 5  | CG | 3.45 (2.06-5.80)  | 2.80E-06 | 15 0    | 9.33  | 2.70E-05 | 2.80E-06 | FullImputed | 0.775 | 0.024 |
|             |    |     |    | GG | -                 | -        | 0       |       |          |          |             |       |       |
|             |    |     |    | AA | 1.00              | -        | 720 116 | 14.93 |          |          |             |       |       |
| rs79024621  | 19 | T>C | 3a | AG | 2.42 (1.67-3.50)  | 2.90E-06 | 30 2    | 8.9   | 2.90E-04 | 2.90E-06 | FullImputed | 0.451 | 0.02  |
|             |    |     |    | GG | -                 | -        | 0       |       |          |          |             |       |       |
|             |    |     |    | CC | 1.00              | -        | 733 118 | 14.77 |          |          |             |       |       |
| rs115332040 | 4  | A>G | 7  | CT | 3.22 (1.97-5.25)  | 2.90E-06 | 17 0    | 9.67  | 7.00E-03 | 2.90E-06 | FullImputed | 0.657 | 0.072 |
|             |    |     |    | TT | -                 | -        | 0       |       |          |          |             |       |       |
|             |    |     |    | GG | 1.00              | -        | 664 108 | 15.07 |          |          |             |       |       |
| rs72821420  | 10 | G>A | 7  | GA | 1.68 (1.33-2.12)  | 1.10E-05 | 83 10   | 10.97 | 7.60E-03 | 3.00E-06 | FullImputed | 0.712 | 0.044 |
|             |    |     |    | AA | 2.64 (0.83-8.43)  | 0.1      | 3 0     | 11.07 |          |          |             |       |       |
|             |    |     |    | AA | 1.00              | -        | 689 116 | 15.03 |          |          |             |       |       |
| rs41277708  | 15 | C>T | 4  | AG | 1.88 (1.44-2.45)  | 3.10E-06 | 61 2    | 10.37 | 4.40E-05 | 3.10E-06 | FullImputed | 0.74  | 0.075 |
|             |    |     |    | GG | -                 | -        | 0       |       |          |          |             |       |       |
|             |    |     |    | TT | 1.00              | -        | 647 110 | 15.07 |          |          |             |       |       |
| rs147578788 | 3  | C>A | 7  | TC | 1.69 (1.37-2.09)  | 1.40E-06 | 101 7   | 10.8  | 1.90E-04 | 3.10E-06 | FullImputed | 0.955 | 0.025 |
|             |    |     |    | CC | 1.23 (0.30-5.00)  | 0.77     | 2 1     | 15.57 |          |          |             |       |       |
|             |    |     |    | AA | 1.00              | -        | 708 116 | 14.87 |          |          |             |       |       |
| rs115249471 | 3  | T>C | 6  | AC | 2.01 (1.46-2.77)  | 1.80E-05 | 41 2    | 10.5  | 2.00E-06 | 3.20E-06 | FullImputed | 0.955 | 0.025 |
|             |    |     |    | CC | 0.86 (4.20-226.8) | 0.00076  | 1 0     | 3.17  |          |          |             |       |       |
|             |    |     |    | CC | 1.00              | -        | 708 116 | 14.87 |          |          |             |       |       |
| rs12522035  | 5  | A>C | 4  | CT | 2.01 (1.46-2.77)  | 1.80E-05 | 41 2    | 10.5  | 2.00E-06 | 3.20E-06 | FullImputed | 0.933 | 0.082 |
|             |    |     |    | TT | 0.86 (4.20-226.8) | 0.00076  | 1 0     | 3.17  |          |          |             |       |       |
|             |    |     |    | CC | 1.00              | -        | 617 105 | 15.13 |          |          |             |       |       |
| rs147535729 | 7  | T>C | 7  | CA | 1.52 (1.26-1.84)  | 1.40E-05 | 128 12  | 11.8  | 6.60E-04 | 3.20E-06 | FullImputed | 0.691 | 0.015 |
|             |    |     |    | AA | 2.30 (0.95-5.57)  | 0.066    | 5 1     | 8.53  |          |          |             |       |       |
|             |    |     |    | CC | 1.00              | -        | 728 116 | 14.83 |          |          |             |       |       |
| rs1807249   | 7  | C>A | 7  | CT | 2.48 (1.62-3.82)  | 3.40E-05 | 21 2    | 7.83  | 3.30E-07 | 3.20E-06 | FullImputed | 0.985 | 0.192 |
|             |    |     |    | TT | 7.00 (2.31-125.2) | 0.0054   | 1 0     | 2.63  |          |          |             |       |       |
|             |    |     |    | AA | 1.00              | -        | 475 80  | 15.97 |          |          |             |       |       |
| rs113924313 | 1  | A>G | 7  | AC | 1.51 (1.29-1.77)  | 2.50E-07 | 247 30  | 13.37 | 1.60E-02 | 3.20E-06 | FullImputed | 0.833 | 0.48  |
|             |    |     |    | CC | 1.33 (0.90-1.95)  | 0.15     | 28 8    | 9.2   |          |          |             |       |       |
|             |    |     |    | GG | 1.00              | -        | 195 31  | 17.3  |          |          |             |       |       |
| rs2181700   | 1  | G>T | 7  | GA | 1.24 (1.05-1.48)  | 0.013    | 369 61  | 14.83 | 3.60E-02 | 3.30E-06 | FullImputed | 0.833 | 0.48  |
|             |    |     |    | AA | 1.63 (1.33-2.01)  | 2.80E-06 | 186 26  | 12.67 |          |          |             |       |       |
|             |    |     |    | TT | 1.00              | -        | 195 31  | 17.3  |          |          |             |       |       |
| rs113309998 | 5  | C>T | 7  | TG | 1.24 (1.05-1.48)  | 0.013    | 369 61  | 14.83 | 3.60E-02 | 3.30E-06 | FullImputed | 0.718 | 0.015 |
|             |    |     |    | GG | 1.63 (1.33-2.01)  | 2.80E-06 | 186 26  | 12.67 |          |          |             |       |       |
|             |    |     |    | TT | 1.00              | -        | 731 118 | 14.83 |          |          |             |       |       |
| rs59567925  | 12 | G>A | 7  | TC | 2.97 (1.88-4.71)  | 3.40E-06 | 19 0    | 6.17  | 2.00E-06 | 3.40E-06 | FullImputed | 0.889 | 0.296 |
|             |    |     |    | CC | -                 | -        | 0       |       |          |          |             |       |       |
|             |    |     |    | AA | 1.00              | -        | 386 49  | 13.83 |          |          |             |       |       |

|             |    |          |     |    |                   |          |         |          |          |          |             |       |       |          |
|-------------|----|----------|-----|----|-------------------|----------|---------|----------|----------|----------|-------------|-------|-------|----------|
| rs1869404   | 3  | T>A      | 5   | AG | 0.77 (0.66-0.89)  | 0.00045  | 312 53  | 15.53    | 2.10E-02 | 3.40E-06 | FullImputed | 0.999 | 0.478 |          |
|             |    |          |     | GG | 0.57 (0.43-0.76)  | 0.00014  | 52 16   | 20.33    |          |          |             |       |       |          |
|             |    |          |     | AA | 1.00              | -        | 207 34  | 17.33    |          |          |             |       |       |          |
|             |    |          |     | AT | 1.31 (1.10-1.55)  | 0.0019   | 367 58  | 13.9     |          |          |             |       |       |          |
| rs9813663   | 3  | A>G      | 6   | TT | 1.61 (1.31-1.98)  | 5.00E-06 | 176 26  | 13.43    | 2.40E-01 | 3.50E-06 | FullImputed | 0.913 | 0.011 |          |
|             |    |          |     | GG | 1.00              | -        | 734 118 | 14.83    |          |          |             |       |       |          |
|             |    |          |     | GA | 3.28(1.98 -5.41)  | 3.50E-06 | 16 0    | 8.47     |          |          |             |       |       |          |
|             |    |          |     | AA | -                 | -        | 0       | 3.90E-05 |          |          |             |       |       | 3.50E-06 |
| rs62387663  | 6  | T>A      | 7   | AA | 1.00              | -        | 716 117 | 14.93    | 2.90E-05 | 3.50E-06 | FullImputed | 0.891 | 0.017 |          |
|             |    |          |     | AT | 2.47 (1.73-3.51)  | 5.50E-07 | 33 1    | 8.28     |          |          |             |       |       |          |
|             |    |          |     | TT | 1.29 (0.18-9.26)  | 0.8      | 1 0     | 30.57    |          |          |             |       |       |          |
|             |    |          |     | GG | 1.00              | -        | 676 113 | 15.2     |          |          |             |       |       |          |
| rs187374384 | 16 | ITGAL    | -   | GA | 1.75 (1.37-2.23)  | 7.70E-06 | 72 5    | 9.5      | 1.40E-05 | 3.50E-06 | FullImputed | 0.576 | 0.073 |          |
|             |    |          |     | AA | 2.55 (0.63-10.33) | 0.19     | 2 0     | 7.62     |          |          |             |       |       |          |
|             |    |          |     | GG | 1.00              | -        | 711 118 | 15.03    |          |          |             |       |       |          |
|             |    |          |     | GA | 2.18 (1.57-3.04)  | 3.60E-06 | 39 0    | 9.03     |          |          |             |       |       |          |
| rs151134852 | 5  | G>A      | 5   | AA | 1.00              | -        | 726 118 | 14.87    | 4.50E-07 | 3.60E-06 | FullImputed | 0.565 | 0.017 |          |
|             |    |          |     | AG | 2.66 (1.76-4.02)  | 3.70E-06 | 24 0    | 9.13     |          |          |             |       |       |          |
|             |    |          |     | GG | -                 | -        | 0       | 8.10E-06 |          |          |             |       |       | 3.70E-06 |
|             |    |          |     | AA | 1.00              | -        | 559 103 | 15.3     |          |          |             |       |       |          |
| rs10947943  | 6  | UNC5CL   | G>A | AG | 1.46 (1.23-1.73)  | 1.00E-05 | 183 15  | 12.07    | 2.50E-03 | 3.70E-06 | FullImputed | 0.96  | 0.14  |          |
|             |    |          |     | GG | 1.83 (0.91-3.70)  | 0.091    | 8 0     | 13.8     |          |          |             |       |       |          |
|             |    |          |     | AA | 1.00              | -        | 623 105 | 15.03    |          |          |             |       |       |          |
|             |    |          |     | AT | 1.58 (1.30-1.92)  | 4.90E-06 | 124 13  | 11.23    |          |          |             |       |       |          |
| rs17127148  | 10 | T>A      | 7   | TT | 1.76 (0.56-5.51)  | 0.33     | 3 0     | 17.1     | 1.10E-01 | 3.70E-06 | FullImputed | 0.968 | 0.079 |          |
|             |    |          |     | AA | 1.00              | -        | 284 40  | 13.2     |          |          |             |       |       |          |
|             |    |          |     | AG | 0.85 (0.72-0.99)  | 0.037    | 344 52  | 14.77    |          |          |             |       |       |          |
|             |    |          |     | GG | 0.60 (0.49-0.74)  | 3.20E-06 | 122 26  | 18.4     |          |          |             |       |       |          |
| rs62263547  | 3  | UPK1B    | G>A | AA | 1.00              | -        | 709 116 | 14.93    | 1.60E-03 | 3.80E-06 | FullImputed | 0.774 | 0.024 |          |
|             |    |          |     | AG | 2.12 (1.54-2.91)  | 3.80E-06 | 41 2    | 9.5      |          |          |             |       |       |          |
|             |    |          |     | GG | -                 | -        | 0       | 4.80E-04 |          |          |             |       |       | 3.80E-06 |
|             |    |          |     | AA | 1.00              | -        | 692 102 | 14.5     |          |          |             |       |       |          |
| rs75955426  | 3  | G>A      | 6   | AG | 0.54 (0.42-0.71)  | 9.00E-06 | 57 15   | 18.1     | 6.80E-02 | 3.80E-06 | FullImputed | 0.96  | 0.041 |          |
|             |    |          |     | GG | 0.27 (0.04-1.91)  | 0.19     | 1 1     | 20.17    |          |          |             |       |       |          |
|             |    |          |     | TT | 1.00              | -        | 733 118 | 14.77    |          |          |             |       |       |          |
|             |    |          |     | TC | 3.04 (1.84-5.03)  | 1.60E-05 | 16 0    | 12.82    |          |          |             |       |       |          |
| rs113747999 | 5  | SREK1IP1 | C>T | CC | 4.76 (0.66-34.32) | 0.12     | 1 0     | 4.73     | 1.50E-03 | 3.80E-06 | FullImputed | 0.882 | 0.012 |          |
|             |    |          |     | AA | 1.00              | -        | 711 117 | 14.93    |          |          |             |       |       |          |
|             |    |          |     | AT | 2.16 (1.56-2.99)  | 3.80E-06 | 39 1    | 9.03     |          |          |             |       |       |          |
|             |    |          |     | TT | -                 | -        | 0       | 1.70E-06 |          |          |             |       |       | 3.80E-06 |
| rs56216401  | 22 | MICAL3   | T>A | TT | 1.00              | -        | 284 40  | 13.2     | 1.60E-03 | 3.90E-06 | FullImputed | 0.99  | 0.405 |          |
|             |    |          |     | TC | 0.84 (0.72-0.99)  | 0.036    | 345 52  | 14.77    |          |          |             |       |       |          |
|             |    |          |     | CC | 0.60 (0.48-0.74)  | 3.30E-06 | 121 26  | 18.4     |          |          |             |       |       |          |
|             |    |          |     | CC | 1.00              | -        | 723 118 | 14.87    |          |          |             |       |       |          |
| rs62263546  | 3  | UPK1B    | C>T | CT | 2.48 (1.67-3.68)  | 6.40E-06 | 26 0    | 7.28     | 1.20E-03 | 3.90E-06 | FullImputed | 0.849 | 0.018 |          |
|             |    |          |     | TT | 3.01 (0.42-21.51) | 0.27     | 1 0     | 10.23    |          |          |             |       |       |          |
|             |    |          |     | CC | 1.00              | -        | 323 35  | 13.07    |          |          |             |       |       |          |
|             |    |          |     | CT | 0.74 (0.64-0.86)  | 0.00013  | 332 65  | 15.8     |          |          |             |       |       |          |
| rs73157529  | 3  | T>C      | 6   | TT | 0.63 (0.50-0.79)  | 6.50E-05 | 95 18   | 15.9     | 1.40E-02 | 4.00E-06 | FullImputed | 0.941 | 0.36  |          |
|             |    |          |     | CT | 1.00              | -        | 322 35  | 13.07    |          |          |             |       |       |          |
|             |    |          |     | CC | 1.00              | -        | 323 35  | 13.07    |          |          |             |       |       |          |
|             |    |          |     | AA | 1.00              | -        | 322 35  | 13.07    |          |          |             |       |       |          |



|             |    |          |     |    |    |                    |          |         |       |          |          |                 |       |       |
|-------------|----|----------|-----|----|----|--------------------|----------|---------|-------|----------|----------|-----------------|-------|-------|
| rs62083974  | 18 | FHOD3    | A>G | 6  | AG | 0.74 (0.64-0.86)   | 0.00014  | 333 65  | 15.67 | 1.50E-02 | 4.00E-06 | FullImputed     | 0.782 | 0.204 |
|             |    |          |     |    | GG | 0.63 (0.50-0.79)   | 6.50E-05 | 95 18   | 15.9  |          |          |                 |       |       |
|             |    |          |     |    | GG | 1.00               | -        | 507 66  | 13.9  |          |          |                 |       |       |
|             |    |          |     |    | GA | 0.69 (0.59-0.81)   | 3.60E-06 | 224 45  | 15.17 |          |          |                 |       |       |
| rs2644254   | 18 | FHOD3    | G>A | 5  | AA | 0.67 (0.43-1.02)   | 0.063    | 19 7    | 26.17 | 8.00E-03 | 4.10E-06 | ImputedInPanSca | 1     | 0.799 |
|             |    |          |     |    | AA | 1.00               | -        | 491 57  | 13.93 |          |          |                 |       |       |
|             |    |          |     |    | AG | 0.70 (0.60-0.82)   | 7.90E-06 | 227 56  | 15.4  |          |          |                 |       |       |
| rs117692629 | 16 |          | G>A | 5  | GG | 0.64 (0.44-0.93)   | 0.019    | 32 5    | 19.27 | 9.90E-04 | 4.10E-06 | FullImputed     | 0.844 | 0.011 |
|             |    |          |     |    | AA | 1.00               | -        | 735 118 | 14.83 |          |          |                 |       |       |
|             |    |          |     |    | AG | 3.39 (2.02-5.71)   | 4.20E-06 | 15 0    | 7.67  |          |          |                 |       |       |
| rs139168389 | 17 |          | X>T | 5  | GG | -                  | -        | 0       |       | 3.30E-06 | 4.20E-06 | FullImputed     | 0.777 | 0.035 |
|             |    |          |     |    | TT | 1.00               | -        | 709 116 | 14.93 |          |          |                 |       |       |
|             |    |          |     |    | TX | 2.13 (1.54-2.94)   | 4.20E-06 | 41 2    | 9.93  |          |          |                 |       |       |
| rs76858354  | 1  |          | G>C | 4  | XX | -                  | -        | 0       |       | 4.30E-03 | 4.20E-06 | FullImputed     | 0.795 | 0.028 |
|             |    |          |     |    | CC | 1.00               | -        | 715 115 | 14.93 |          |          |                 |       |       |
|             |    |          |     |    | CG | 2.21 (1.58-3.10)   | 4.30E-06 | 35 3    | 9.23  |          |          |                 |       |       |
| rs116665498 | 4  |          | A>G | 2b | GG | -                  | -        | 0       |       | 3.20E-04 | 4.30E-06 | FullImputed     | 0.82  | 0.024 |
|             |    |          |     |    | GG | 1.00               | -        | 702 117 | 15.03 |          |          |                 |       |       |
|             |    |          |     |    | GA | 1.92 (1.43-2.59)   | 1.80E-05 | 47 1    | 10.37 |          |          |                 |       |       |
| rs9376153   | 6  |          | G>C | 7  | AA | 4.15 (1.93-103.82) | 0.0092   | 1 0     | 3.17  | 2.80E-08 | 4.30E-06 | FullImputed     | 0.956 | 0.041 |
|             |    |          |     |    | CC | 1.00               | -        | 673 115 | 15.13 |          |          |                 |       |       |
|             |    |          |     |    | CG | 1.73 (1.36-2.22)   | 1.10E-05 | 75 3    | 9.9   |          |          |                 |       |       |
| rs80252185  | 9  | FAM189A2 | G>A | 2b | GG | 2.69 (0.66-10.85)  | 0.17     | 2 0     | 7.62  | 7.40E-07 | 4.30E-06 | FullImputed     | 0.749 | 0.014 |
|             |    |          |     |    | AA | 1.00               | -        | 725 116 | 14.83 |          |          |                 |       |       |
|             |    |          |     |    | AG | 2.57 (1.72-3.84)   | 4.40E-06 | 25 2    | 8.5   |          |          |                 |       |       |
| rs35137661  | 9  |          | A>G | 7  | GG | -                  | -        | 0       |       | 1.70E-03 | 4.40E-06 | FullImputed     | 0.737 | 0.013 |
|             |    |          |     |    | GG | 1.00               | -        | 725 116 | 14.83 |          |          |                 |       |       |
|             |    |          |     |    | GA | 2.57 (1.72-3.84)   | 4.40E-06 | 25 2    | 8.5   |          |          |                 |       |       |
| rs13289130  | 9  |          | T>C | 7  | AA | -                  | -        | 0       |       | 1.70E-03 | 4.40E-06 | FullImputed     | 0.735 | 0.013 |
|             |    |          |     |    | CC | 1.00               | -        | 725 116 | 14.83 |          |          |                 |       |       |
|             |    |          |     |    | CT | 2.57 (1.72-3.84)   | 4.40E-06 | 25 2    | 8.5   |          |          |                 |       |       |
| rs17180111  | 14 | PLEKHG3  | G>A | 5  | TT | -                  | -        | 0       |       | 1.70E-03 | 4.40E-06 | FullImputed     | 0.914 | 0.041 |
|             |    |          |     |    | AA | 1.00               | -        | 708 116 | 15.03 |          |          |                 |       |       |
|             |    |          |     |    | AG | 2.07 (1.52-2.83)   | 4.40E-06 | 42 2    | 11.88 |          |          |                 |       |       |
| rs167161    | 5  | PDE4D    | A>C | 7  | GG | -                  | -        | 0       |       | 4.90E-04 | 4.40E-06 | ImputedInPanSca | 0.94  | 0.679 |
|             |    |          |     |    | CC | 1.00               | -        | 348 38  | 12.57 |          |          |                 |       |       |
|             |    |          |     |    | CA | 0.71 (0.61-0.82)   | 7.90E-06 | 327 62  | 15.87 |          |          |                 |       |       |
| rs12453472  | 17 | PRKCA    | G>T | 4  | AA | 0.66 (0.51-0.84)   | 0.00079  | 75 18   | 17.83 | 7.80E-04 | 4.60E-06 | FullImputed     | 0.928 | 0.04  |
|             |    |          |     |    | TT | 1.00               | -        | 698 113 | 14.83 |          |          |                 |       |       |
|             |    |          |     |    | TG | 1.93 (1.46-2.56)   | 4.60E-06 | 52 5    | 10.97 |          |          |                 |       |       |
| rs117044747 | 13 | COL4A2   | G>C | 4  | GG | -                  | -        | 0       |       | 1.20E-02 | 4.60E-06 | FullImputed     | 0.642 | 0.014 |
|             |    |          |     |    | CC | 1.00               | -        | 737 118 | 14.8  |          |          |                 |       |       |
|             |    |          |     |    | CG | 3.68 (2.11-6.43)   | 4.70E-06 | 13 0    | 6.9   |          |          |                 |       |       |
| rs185203    | 5  |          | A>G | 4  | GG | -                  | -        | 0       |       | 1.20E-03 | 4.70E-06 | Genotyped       | 1     | 0.062 |
|             |    |          |     |    | GG | 1.00               | -        | 659 113 | 15.13 |          |          |                 |       |       |
|             |    |          |     |    | GA | 1.80 (1.44-2.25)   | 2.70E-07 | 89 4    | 11.1  |          |          |                 |       |       |
| rs1876209   | 5  | PDE4D    | G>A | 5  | AA | 0.81 (0.20-3.27)   | 0.77     | 2 1     | 17.6  | 2.40E-05 | 4.80E-06 | ImputedInPanSca | 1     | 0.286 |
|             |    |          |     |    | AA | 1.00               | -        | 396 45  | 12.67 |          |          |                 |       |       |
|             |    |          |     |    | AG | 0.73 (0.63-0.85)   | 3.60E-05 | 296 59  | 16.27 |          |          |                 |       |       |
| rs79381691  | 14 |          | T>C | 7  | GG | 0.63 (0.48-0.83)   | 0.0011   | 58 14   | 18.73 | 4.70E-04 | 4.90E-06 | FullImputed     | 0.879 | 0.017 |
|             |    |          |     |    | GG | -                  | -        | 0       |       |          |          |                 |       |       |
|             |    |          |     |    | CC | 1.00               | -        | 725 116 | 14.93 |          |          |                 |       |       |

|             |    |          |     |    |    |                   |          |         |       |          |          |                 |       |       |
|-------------|----|----------|-----|----|----|-------------------|----------|---------|-------|----------|----------|-----------------|-------|-------|
| rs13298177  | 9  | APBA1    | G>T | 5  | CT | 2.57 (1.71-3.85)  | 4.90E-06 | 25 2    | 9.5   | 1.80E-04 | 4.90E-06 | FullImputed     | 0.712 | 0.014 |
|             |    |          |     |    | TT | -                 | -        | 0       | 14.83 |          |          |                 |       |       |
|             |    |          |     |    | TT | 1.00              | -        | 725 116 | 8.43  |          |          |                 |       |       |
|             |    |          |     |    | TG | 2.55 (1.71-3.82)  | 5.00E-06 | 25 2    | 8.43  |          |          |                 |       |       |
| rs114120058 | 5  |          | G>A | 7  | GG | -                 | -        | 0       |       | 1.30E-03 | 5.00E-06 | FullImputed     | 0.944 | 0.015 |
|             |    |          |     |    | AA | 1.00              | -        | 724 118 | 14.87 |          |          |                 |       |       |
|             |    |          |     |    | AG | 2.51 (1.69-3.73)  | 5.30E-06 | 26 0    | 10.53 |          |          |                 |       |       |
|             |    |          |     |    | GG | -                 | -        | 0       |       |          |          |                 |       |       |
| rs3746127   | 19 | CACTIN   | C>T | 3a | TT | 1.00              | -        | 426 89  | 15.97 | 2.90E-04 | 5.30E-06 | FullImputed     | 0.992 | 0.225 |
|             |    |          |     |    | TC | 1.40 (1.20-1.63)  | 2.10E-05 | 276 23  | 13.2  |          |          |                 |       |       |
|             |    |          |     |    | CC | 1.54 (1.13-2.10)  | 0.0059   | 48 6    | 11.25 |          |          |                 |       |       |
|             |    |          |     |    | AA | 1.00              | -        | 627 107 | 15.4  |          |          |                 |       |       |
| rs58155668  | 7  | CNT -P2  | C>A | 6  | AC | 1.56 (1.27-1.91)  | 2.00E-05 | 116 11  | 11.2  | 1.50E-04 | 5.30E-06 | FullImputed     | 0.79  | 0.08  |
|             |    |          |     |    | CC | 2.43 (1.06-5.56)  | 0.036    | 7 0     | 6.13  |          |          |                 |       |       |
|             |    |          |     |    | AA | 1.00              | -        | 717 117 | 14.83 |          |          |                 |       |       |
|             |    |          |     |    | AG | 2.25 (1.58-3.18)  | 5.50E-06 | 33 1    | 9.27  |          |          |                 |       |       |
| rs114536038 | 4  |          | G>A | 7  | GG | -                 | -        | 0       |       | 3.10E-03 | 5.50E-06 | FullImputed     | 0.637 | 0.024 |
|             |    |          |     |    | CC | 1.00              | -        | 697 118 | 15.07 |          |          |                 |       |       |
|             |    |          |     |    | CT | 1.92 (1.44-2.58)  | 1.10E-05 | 52 0    | 10.63 |          |          |                 |       |       |
|             |    |          |     |    | TT | 4.59 (0.61-34.62) | 0.14     | 1 0     | 4.43  |          |          |                 |       |       |
| rs4702954   | 5  |          | T>C | 7  | TT | 1.00              | -        | 731 117 | 14.8  | 1.00E-06 | 5.50E-06 | FullImputed     | 0.656 | 0.014 |
|             |    |          |     |    | TX | 2.85 (1.81-4.47)  | 5.50E-06 | 19 1    | 7.35  |          |          |                 |       |       |
|             |    |          |     |    | XX | -                 | -        | 0       |       |          |          |                 |       |       |
|             |    |          |     |    | AA | 1.00              | -        | 698 114 | 15.07 |          |          |                 |       |       |
| rs200112570 | 14 |          | X>T | 4  | AX | 1.94 (1.46-2.58)  | 5.60E-06 | 52 4    | 10.45 | 2.10E-03 | 5.60E-06 | FullImputed     | 0.841 | 0.033 |
|             |    |          |     |    | XX | -                 | -        | 0       |       |          |          |                 |       |       |
|             |    |          |     |    | TT | 1.00              | -        | 731 117 | 14.8  |          |          |                 |       |       |
|             |    |          |     |    | TX | 2.85 (1.81-4.47)  | 5.50E-06 | 19 1    | 7.35  |          |          |                 |       |       |
| esv2674563  | 4  |          | X>A | -  | AA | 1.00              | -        | 698 114 | 15.07 | 2.10E-03 | 5.60E-06 | FullImputed     | 0.841 | 0.033 |
|             |    |          |     |    | AX | 1.94 (1.46-2.58)  | 5.60E-06 | 52 4    | 10.45 |          |          |                 |       |       |
|             |    |          |     |    | XX | -                 | -        | 0       |       |          |          |                 |       |       |
|             |    |          |     |    | TT | 1.00              | -        | 448 72  | 16.2  |          |          |                 |       |       |
| rs12638565  | 3  | ROBO1    | C>T | 7  | TC | 1.32 (1.13-1.54)  | 0.00043  | 264 43  | 13.5  | 3.70E-03 | 5.70E-06 | FullImputed     | 0.932 | 0.233 |
|             |    |          |     |    | CC | 1.80 (1.29-2.51)  | 0.00058  | 38 3    | 9.5   |          |          |                 |       |       |
|             |    |          |     |    | CC | 1.00              | -        | 707 116 | 14.93 |          |          |                 |       |       |
|             |    |          |     |    | CT | 2.01 (1.46-2.75)  | 1.70E-05 | 42 2    | 9.22  |          |          |                 |       |       |
| rs115985210 | 2  | VWC2L    | T>C | 7  | TT | 4.78 (0.67-34.27) | 0.12     | 1 0     | 8.27  | 5.40E-03 | 5.80E-06 | FullImputed     | 0.825 | 0.031 |
|             |    |          |     |    | GG | 1.00              | -        | 731 117 | 14.87 |          |          |                 |       |       |
|             |    |          |     |    | GT | 2.75 (1.71-4.43)  | 3.20E-05 | 18 1    | 9.63  |          |          |                 |       |       |
|             |    |          |     |    | TT | 5.78 (0.81-41.55) | 0.081    | 1 0     | 6.8   |          |          |                 |       |       |
| rs143281082 | 3  |          | T>G | 7  | CC | 1.00              | -        | 733 118 | 14.83 | 1.90E-04 | 5.90E-06 | FullImputed     | 0.935 | 0.011 |
|             |    |          |     |    | CT | 3.09 (1.90-5.04)  | 6.10E-06 | 17 0    | 6.1   |          |          |                 |       |       |
|             |    |          |     |    | TT | -                 | -        | 0       |       |          |          |                 |       |       |
|             |    |          |     |    | CC | 1.00              | -        | 320 36  | 13.13 |          |          |                 |       |       |
| rs77802244  | 8  | PSD3     | T>C | 5  | CT | 0.73 (0.63-0.86)  | 9.60E-05 | 332 64  | 15.57 | 1.70E-05 | 6.10E-06 | ImputedInPanSca | 0.895 | 0.643 |
|             |    |          |     |    | TT | 0.64 (0.51-0.80)  | 1.00E-04 | 98 18   | 16.57 |          |          |                 |       |       |
|             |    |          |     |    | TT | 1.00              | -        | 655 109 | 15.17 |          |          |                 |       |       |
|             |    |          |     |    | TA | 1.69 (1.35-2.11)  | 3.30E-06 | 92 9    | 11.2  |          |          |                 |       |       |
| rs34191776  | 10 | CCSER2   | A>T | 6  | AA | 1.46 (0.46-4.65)  | 0.52     | 3 0     | 22    | 2.70E-02 | 6.20E-06 | FullImputed     | 0.99  | 0.067 |
|             |    |          |     |    | TT | 1.00              | -        | 726 117 | 14.83 |          |          |                 |       |       |
|             |    |          |     |    | TC | 2.60 (1.72-3.94)  | 6.30E-06 | 24 1    | 8.6   |          |          |                 |       |       |
|             |    |          |     |    | CC | -                 | -        | 0       |       |          |          |                 |       |       |
| rs146526732 | 12 | C12orf76 | C>T | 6  | CC | 1.00              | -        | 246 46  | 17.03 | 2.30E-02 | 6.30E-06 | FullImputed     | 0.939 | 0.558 |
|             |    |          |     |    | CA | 1.32 (1.13-1.56)  | 0.00068  | 368 51  | 14.3  |          |          |                 |       |       |
|             |    |          |     |    | AA | 1.58 (1.28-1.96)  | 2.30E-05 | 136 21  | 13.03 |          |          |                 |       |       |
|             |    |          |     |    | TT | 1.00              | -        | 726 117 | 14.83 |          |          |                 |       |       |
| rs9726241   | 1  |          | A>C | 7  | CC | 1.00              | -        | 246 46  | 17.03 | 2.30E-02 | 6.30E-06 | FullImputed     | 0.939 | 0.558 |
|             |    |          |     |    | CA | 1.32 (1.13-1.56)  | 0.00068  | 368 51  | 14.3  |          |          |                 |       |       |
|             |    |          |     |    | AA | 1.58 (1.28-1.96)  | 2.30E-05 | 136 21  | 13.03 |          |          |                 |       |       |
|             |    |          |     |    | CC | 1.00              | -        | 658 109 | 15.13 |          |          |                 |       |       |
| rs17103428  | 10 | CCSER2   | T>C | 7  | CC | 1.00              | -        | 658 109 | 15.13 | 2.30E-02 | 6.40E-06 | FullImputed     | 0.999 | 0.065 |

|             |    |         |     |    |    |                   |          |         |       |          |          |               |       |       |
|-------------|----|---------|-----|----|----|-------------------|----------|---------|-------|----------|----------|---------------|-------|-------|
| rs200541711 | 1  |         | T>X | 6  | CT | 1.65 (1.32-2.06)  | 1.20E-05 | 90 9    | 11.23 | 1.10E-02 | 6.40E-06 | FullImputed   | 0.838 | 0.028 |
|             |    |         |     |    | TT | 2.33 (0.56-9.62)  | 0.24     | 2 0     | 17.58 |          |          |               |       |       |
|             |    |         |     |    | XX | 1.00              | -        | 708 116 | 14.87 |          |          |               |       |       |
|             |    |         |     |    | XT | 2.38 (1.73-3.28)  | 1.10E-07 | 41 2    | 9.47  |          |          |               |       |       |
| rs7614056   | 3  | LRRC15  | A>G | 5  | TT | 0.72 (0.10-5.19)  | 0.75     | 1 0     | 27.8  | 1.90E-03 | 6.50E-06 | FullImputed   | 0.923 | 0.358 |
|             |    |         |     |    | GG | 1.00              | -        | 318 36  | 13.13 |          |          |               |       |       |
|             |    |         |     |    | GA | 0.74 (0.64-0.87)  | 0.00017  | 332 64  | 15.57 |          |          |               |       |       |
| rs2351675   | 8  | NKAIN3  | C>T | 6  | AA | 0.64 (0.51-0.80)  | 8.40E-05 | 100 18  | 16.57 | 3.70E-02 | 6.70E-06 | ImputedInPanC | 0.99  | 0.873 |
|             |    |         |     |    | TT | 1.00              | -        | 555 93  | 15.13 |          |          |               |       |       |
|             |    |         |     |    | TC | 1.42 (1.20-1.68)  | 4.50E-05 | 184 25  | 12.37 |          |          |               |       |       |
| rs28393847  | 3  | LRRC15  | A>G | -  | CC | 2.00 (1.07-3.72)  | 0.029    | 11 0    | 9.37  | 3.10E-02 | 6.70E-06 | FullImputed   | 0.94  | 0.36  |
|             |    |         |     |    | GG | 1.00              | -        | 319 35  | 13.07 |          |          |               |       |       |
|             |    |         |     |    | GA | 0.75 (0.64-0.87)  | 0.00019  | 334 64  | 15.8  |          |          |               |       |       |
| rs903330    | 3  | LRRC15  | A>G | 5  | AA | 0.63 (0.51-0.80)  | 9.20E-05 | 97 19   | 15.53 | 1.90E-02 | 6.80E-06 | FullImputed   | 0.92  | 0.358 |
|             |    |         |     |    | GG | 1.00              | -        | 317 36  | 13.13 |          |          |               |       |       |
|             |    |         |     |    | GA | 0.74 (0.64-0.87)  | 0.00018  | 333 64  | 15.57 |          |          |               |       |       |
| rs115296711 | 5  | COL23A1 | C>A | 5  | AA | 0.63 (0.51-0.80)  | 8.40E-05 | 100 18  | 16.57 | 4.00E-02 | 7.00E-06 | FullImputed   | 0.8   | 0.014 |
|             |    |         |     |    | AA | 1.00              | -        | 724 117 | 14.83 |          |          |               |       |       |
|             |    |         |     |    | AC | 2.48 (1.67-3.68)  | 7.00E-06 | 26 1    | 9.47  |          |          |               |       |       |
| rs74787411  | 7  |         | C>T | 5  | CC | -                 | -        | 0       | -     | 1.10E-03 | 7.00E-06 | FullImputed   | 0.908 | 0.023 |
|             |    |         |     |    | TT | 1.00              | -        | 711 118 | 14.83 |          |          |               |       |       |
|             |    |         |     |    | TC | 2.07 (1.48-2.88)  | 1.90E-05 | 38 0    | 12.55 |          |          |               |       |       |
| rs2828530   | 21 |         | C>T | 6  | CC | 4.20 (0.59-30.10) | 0.15     | 1 0     | 8.43  | 1.40E-02 | 7.10E-06 | FullImputed   | 0.993 | 0.321 |
|             |    |         |     |    | TT | 1.00              | -        | 349 67  | 16.87 |          |          |               |       |       |
|             |    |         |     |    | TC | 1.29 (1.11-1.50)  | 0.0011   | 327 45  | 13.37 |          |          |               |       |       |
| rs111635420 | 1  | CSMD2   | G>A | 7  | CC | 1.65 (1.28-2.13)  | 9.60E-05 | 74 6    | 11.42 | 4.80E-03 | 7.10E-06 | FullImputed   | 0.523 | 0.018 |
|             |    |         |     |    | AA | 1.00              | -        | 731 117 | 14.83 |          |          |               |       |       |
|             |    |         |     |    | AG | 2.92 (1.83-4.67)  | 7.40E-06 | 19 1    | 8.05  |          |          |               |       |       |
| rs114640170 | 1  | CSMD2   | A>T | 6  | GG | -                 | -        | 0       | -     | 7.60E-03 | 7.40E-06 | FullImputed   | 0.521 | 0.018 |
|             |    |         |     |    | TT | 1.00              | -        | 731 117 | 14.83 |          |          |               |       |       |
|             |    |         |     |    | TA | 2.92 (1.83-4.67)  | 7.40E-06 | 19 1    | 8.05  |          |          |               |       |       |
| rs9370856   | 6  |         | T>G | 7  | AA | -                 | -        | 0       | -     | 7.60E-03 | 7.40E-06 | FullImputed   | 0.986 | 0.021 |
|             |    |         |     |    | GG | 1.00              | -        | 710 117 | 14.93 |          |          |               |       |       |
|             |    |         |     |    | GT | 2.20 (1.59-3.05)  | 2.20E-06 | 39 1    | 8.83  |          |          |               |       |       |
| rs117339855 | 12 |         | G>C | 7  | TT | 1.28 (0.18-9.20)  | 0.81     | 1 0     | 30.57 | 9.60E-05 | 7.60E-06 | FullImputed   | 0.927 | 0.041 |
|             |    |         |     |    | CC | 1.00              | -        | 691 112 | 15.07 |          |          |               |       |       |
|             |    |         |     |    | CG | 1.84 (1.41-2.41)  | 7.60E-06 | 59 6    | 9.73  |          |          |               |       |       |
| rs79729746  | 8  |         | G>A | 6  | GG | -                 | -        | 0       | -     | 5.30E-03 | 7.60E-06 | FullImputed   | 0.765 | 0.058 |
|             |    |         |     |    | AA | 1.00              | -        | 672 112 | 15.13 |          |          |               |       |       |
|             |    |         |     |    | AG | 1.67 (1.32-2.13)  | 2.60E-05 | 76 6    | 11.17 |          |          |               |       |       |
| rs139947234 | 1  |         | G>A | 6  | GG | 3.32 (0.82-13.40) | 0.092    | 2 0     | 8.22  | 7.20E-03 | 7.80E-06 | FullImputed   | 0.68  | 0.023 |
|             |    |         |     |    | AA | 1.00              | -        | 721 117 | 14.83 |          |          |               |       |       |
|             |    |         |     |    | AG | 2.36 (1.62-3.44)  | 7.90E-06 | 29 1    | 8.52  |          |          |               |       |       |
| rs56348360  | 19 |         | C>T | 3a | GG | -                 | -        | 0       | -     | 1.30E-03 | 7.90E-06 | FullImputed   | 0.886 | 0.245 |
|             |    |         |     |    | TT | 1.00              | -        | 424 79  | 15.97 |          |          |               |       |       |
|             |    |         |     |    | TC | 1.27 (1.09-1.48)  | 0.0018   | 285 36  | 13.43 |          |          |               |       |       |
| rs74322196  | 19 | PIP5K1C | G>A | 5  | CC | 1.94 (1.40-2.68)  | 6.40E-05 | 41 3    | 10.65 | 1.60E-03 | 7.90E-06 | FullImputed   | 0.913 | 0.076 |
|             |    |         |     |    | AA | 1.00              | -        | 634 112 | 15.07 |          |          |               |       |       |
|             |    |         |     |    | AG | 1.60 (1.31-1.96)  | 6.20E-06 | 111 6   | 12.67 |          |          |               |       |       |
| rs142270732 | 2  |         | C>G | 2b | GG | 1.53 (0.63-3.70)  | 0.35     | 5 0     | 11.43 | 1.20E-03 | 8.00E-06 | FullImputed   | 0.8   | 0.016 |
|             |    |         |     |    | GG | 1.00              | -        | 731 118 | 14.83 |          |          |               |       |       |

|             |    |          |     |    |    |                  |          |         |          |          |          |               |       |       |
|-------------|----|----------|-----|----|----|------------------|----------|---------|----------|----------|----------|---------------|-------|-------|
| rs1113479   | 3  | RAB6B    | C>T | 5  | GC | 2.86 (1.80-4.53) | 8.10E-06 | 19 0    | 6.9      | 2.40E-04 | 8.10E-06 | Genotyped     | 1     | 0.505 |
|             |    |          |     |    | CC | -                | -        | 0       | 17.97    |          |          |               |       |       |
|             |    |          |     |    | TT | 1.00             | -        | 196 39  | 14.6     |          |          |               |       |       |
|             |    |          |     |    | TC | 1.36 (1.15-1.62) | 0.00045  | 375 56  | 13.37    |          |          |               |       |       |
| rs13278122  | 8  | CSMD1    | T>G | 7  | CC | 1.58 (1.28-1.95) | 1.50E-05 | 179 23  | 15.97    | 3.10E-03 | 8.40E-06 | ImputedInPanC | 0.81  | 0.167 |
|             |    |          |     |    | GG | 1.00             | -        | 514 86  | 12.57    |          |          |               |       |       |
|             |    |          |     |    | GT | 1.34 (1.14-1.57) | 0.00033  | 213 31  | 8.53     |          |          |               |       |       |
| rs34060320  | 9  | FAM189A2 | T>G | 7  | TT | 1.96 (1.29-2.99) | 0.0018   | 23 1    | 14.83    | 6.30E-03 | 8.60E-06 | FullImputed   | 0.753 | 0.015 |
|             |    |          |     |    | GG | 1.00             | -        | 723 116 | 9.5      |          |          |               |       |       |
|             |    |          |     |    | GT | 2.42 (1.64-3.56) | 8.60E-06 | 27 2    | 13.9     |          |          |               |       |       |
| rs4906695   | 15 | SNRPN    | C>G | 7  | TT | -                | -        | 0       | 16.3     | 3.10E-03 | 8.60E-06 | Genotyped     | 1     | 0.829 |
|             |    |          |     |    | GG | 1.00             | -        | 519 71  | 17.73    |          |          |               |       |       |
|             |    |          |     |    | GC | 0.71 (0.60-0.83) | 2.70E-05 | 209 37  | 14.07    |          |          |               |       |       |
| rs9726805   | 1  |          | C>T | 6  | CC | 0.63 (0.42-0.94) | 0.023    | 22 10   | 17.2     | 9.30E-03 | 8.90E-06 | FullImputed   | 0.944 | 0.561 |
|             |    |          |     |    | TT | 1.00             | -        | 247 47  | 13.03    |          |          |               |       |       |
|             |    |          |     |    | TC | 1.32 (1.12-1.55) | 0.00074  | 369 50  | 17.2     |          |          |               |       |       |
| rs79101973  | 1  |          | G>A | 6  | CC | 1.57 (1.27-1.94) | 3.40E-05 | 134 21  | 17.2     | 1.70E-02 | 9.00E-06 | FullImputed   | 0.941 | 0.56  |
|             |    |          |     |    | AA | 1.00             | -        | 247 47  | 13.03    |          |          |               |       |       |
|             |    |          |     |    | AG | 1.32 (1.12-1.55) | 0.00074  | 369 50  | 14.07    |          |          |               |       |       |
| rs112292970 | 7  |          | A>T | 6  | GG | 1.57 (1.27-1.94) | 3.40E-05 | 134 21  | 14.83    | 1.70E-02 | 9.00E-06 | FullImputed   | 0.658 | 0.015 |
|             |    |          |     |    | TT | 1.00             | -        | 729 118 | 6.53     |          |          |               |       |       |
|             |    |          |     |    | TA | 2.70 (1.74-4.19) | 9.00E-06 | 21 0    | 14.8     |          |          |               |       |       |
| rs143824007 | 17 |          | C>G | 7  | AA | -                | -        | 0       | 8.97     | 5.90E-04 | 9.00E-06 | FullImputed   | 0.904 | 0.016 |
|             |    |          |     |    | GG | 1.00             | -        | 728 117 | 17.3     |          |          |               |       |       |
|             |    |          |     |    | GC | 2.67 (1.73-4.11) | 9.00E-06 | 22 1    | 14.07    |          |          |               |       |       |
| rs6692964   | 1  |          | T>G | 7  | CC | -                | -        | 0       | 12.5     | 2.50E-03 | 9.00E-06 | FullImputed   | 0.98  | 0.565 |
|             |    |          |     |    | GG | 1.00             | -        | 231 47  | 12.5     |          |          |               |       |       |
|             |    |          |     |    | GT | 1.34 (1.14-1.58) | 0.00049  | 386 49  | 15.4     |          |          |               |       |       |
| rs11752345  | 6  | WTAP     | C>T | 4  | TT | 1.58 (1.27-1.97) | 3.60E-05 | 133 22  | 16       | 8.50E-03 | 9.10E-06 | FullImputed   | 0.946 | 0.224 |
|             |    |          |     |    | TT | 1.00             | -        | 458 83  | 12.57    |          |          |               |       |       |
|             |    |          |     |    | TC | 1.43 (1.23-1.67) | 5.20E-06 | 251 30  | 15.4     |          |          |               |       |       |
| rs9489473   | 6  |          | A>T | 7  | CC | 1.42 (1.03-1.96) | 0.033    | 41 5    | 15.07    | 1.40E-02 | 9.20E-06 | FullImputed   | 0.994 | 0.023 |
|             |    |          |     |    | TT | 1.00             | -        | 704 117 | 9.43     |          |          |               |       |       |
|             |    |          |     |    | TA | 2.01 (1.48-2.74) | 9.30E-06 | 46 1    | 15.07    |          |          |               |       |       |
| rs9481838   | 6  |          | T>G | 6  | AA | -                | -        | 0       | 9.43     | 1.10E-06 | 9.30E-06 | FullImputed   | 0.994 | 0.023 |
|             |    |          |     |    | GG | 1.00             | -        | 704 117 | 12.13    |          |          |               |       |       |
|             |    |          |     |    | GT | 2.01 (1.48-2.74) | 9.30E-06 | 46 1    | 15.57    |          |          |               |       |       |
| rs13077612  | 3  | RAB6B    | C>T | 5  | TT | -                | -        | 0       | 16.53    | 1.10E-06 | 9.30E-06 | ImputedInPanC | 0.752 | 0.437 |
|             |    |          |     |    | TT | 1.00             | -        | 235 32  | 16.53    |          |          |               |       |       |
|             |    |          |     |    | TC | 0.85 (0.72-0.99) | 0.041    | 391 55  | 14.93    |          |          |               |       |       |
| rs146134374 | 19 |          | G>A | 7  | CC | 0.60 (0.49-0.75) | 7.80E-06 | 124 31  | 5.33     | 2.00E-03 | 9.60E-06 | FullImputed   | 0.593 | 0.015 |
|             |    |          |     |    | AA | 1.00             | -        | 727 117 | 9.10E-06 |          |          |               |       |       |
|             |    |          |     |    | AG | 2.58 (1.70-3.93) | 9.60E-06 | 23 1    | 9.60E-06 |          |          |               |       |       |
| rs4974531   | 3  |          | G>A | 7  | GG | -                | -        | 0       | 12.9     | 9.10E-06 | 9.60E-06 | FullImputed   | 0.912 | 0.375 |
|             |    |          |     |    | AA | 1.00             | -        | 310 33  | 15.8     |          |          |               |       |       |
|             |    |          |     |    | AG | 0.73 (0.63-0.85) | 7.00E-05 | 339 66  | 15.9     |          |          |               |       |       |
| rs144950742 | 6  |          | A>T | 3a | GG | 0.65 (0.52-0.81) | 0.00016  | 101 19  | 14.87    | 8.60E-03 | 9.70E-06 | FullImputed   | 0.894 | 0.02  |
|             |    |          |     |    | TT | 1.00             | -        | 714 118 | 8.3      |          |          |               |       |       |
|             |    |          |     |    | TA | 2.30 (1.63-3.24) | 2.30E-06 | 35 0    | 30.57    |          |          |               |       |       |
| rs77047261  | 1  |          | C>T | 5  | AA | 1.28 (0.18-9.22) | 0.8      | 1 0     | 15.03    | 6.90E-06 | 9.70E-06 | FullImputed   | 0.892 | 0.053 |
|             |    |          |     |    | TT | 1.00             | -        | 678 115 |          |          |          |               |       |       |

|             |    |          |     |   |    |                    |          |         |       |          |          |             |       |       |
|-------------|----|----------|-----|---|----|--------------------|----------|---------|-------|----------|----------|-------------|-------|-------|
| rs1768883   | 9  | PTPRD    | T>C | 6 | TC | 1.82 (1.41-2.35)   | 5.10E-06 | 67 3    | 8.73  | 3.90E-05 | 9.80E-06 | FullImputed | 0.971 | 0.349 |
|             |    |          |     |   | CC | 1.58 (0.65-3.82)   | 0.31     | 5 0     | 12.37 |          |          |             |       |       |
|             |    |          |     |   | CC | 1.00               | -        | 334 44  | 13.9  |          |          |             |       |       |
|             |    |          |     |   | CT | 0.82 (0.70-0.95)   | 0.0097   | 331 49  | 14.67 |          |          |             |       |       |
| rs11917871  | 3  | CAC -2D3 | C>T | 6 | TT | 0.60 (0.47-0.76)   | 2.30E-05 | 85 25   | 18.6  | 5.60E-03 | 9.80E-06 | FullImputed | 0.93  | 0.585 |
|             |    |          |     |   | TT | 1.00               | -        | 260 25  | 12.6  |          |          |             |       |       |
|             |    |          |     |   | TC | 0.76 (0.65-0.89)   | 0.00095  | 365 66  | 15.57 |          |          |             |       |       |
|             |    |          |     |   | CC | 0.63 (0.51-0.78)   | 2.60E-05 | 125 27  | 17.73 |          |          |             |       |       |
| rs113934481 | 3  | SENP5    | A>G | 5 | GG | 1.00               | -        | 726 118 | 14.8  | 1.00E-04 | 9.90E-06 | FullImputed | 0.866 | 0.01  |
|             |    |          |     |   | GA | 2.54 (1.68-3.84)   | 9.90E-06 | 24 0    | 8.8   |          |          |             |       |       |
|             |    |          |     |   | AA | -                  | -        | 0       | -     |          |          |             |       |       |
|             |    |          |     |   | TT | 1.00               | -        | 708 117 | 14.87 |          |          |             |       |       |
| rs77073910  | 7  |          | C>T | 5 | TC | 2.04 (1.49-2.80)   | 9.90E-06 | 42 1    | 12.17 | 4.50E-04 | 9.90E-06 | FullImputed | 0.836 | 0.025 |
|             |    |          |     |   | CC | -                  | -        | 0       | -     |          |          |             |       |       |
|             |    |          |     |   | AA | 1.00               | -        | 718 116 | 14.93 |          |          |             |       |       |
|             |    |          |     |   | AG | 2.17 (1.51-3.13)   | 3.00E-05 | 31 2    | 10.23 |          |          |             |       |       |
| rs78107574  | 17 |          | G>A | 5 | GG | 4.40 (0.61-31.57)  | 0.14     | 1 0     | 7.9   | 4.40E-03 | 9.90E-06 | FullImputed | 0.809 | 0.021 |
|             |    |          |     |   | AA | 1.00               | -        | 645 111 | 15.07 |          |          |             |       |       |
|             |    |          |     |   | AG | 1.59 (1.29-1.96)   | 1.20E-05 | 104 7   | 12.47 |          |          |             |       |       |
|             |    |          |     |   | GG | 1.86 (0.26-13.31)  | 0.54     | 1 0     | 21.83 |          |          |             |       |       |
| rs143407704 | 3  |          | G>A | 7 | CC | 1.00               | -        | 659 109 | 15.13 | 1.20E-03 | 1.00E-05 | FullImputed | 0.997 | 0.064 |
|             |    |          |     |   | CT | 1.63 (1.30-2.04)   | 1.90E-05 | 89 9    | 11.27 |          |          |             |       |       |
|             |    |          |     |   | TT | 2.33 (0.56-9.62)   | 0.24     | 2 0     | 17.58 |          |          |             |       |       |
|             |    |          |     |   | CC | 1.00               | -        | 366 72  | 15.9  |          |          |             |       |       |
| rs12771480  | 10 | CCSER2   | T>C | 7 | CT | 1.30 (1.12-1.52)   | 0.00063  | 308 40  | 14.37 | 1.60E-03 | 1.00E-05 | FullImputed | 0.977 | 0.285 |
|             |    |          |     |   | TT | 1.60 (1.24-2.05)   | 0.00026  | 76 6    | 10.33 |          |          |             |       |       |
|             |    |          |     |   | CC | 1.00               | -        | 712 116 | 14.93 |          |          |             |       |       |
|             |    |          |     |   | CT | 2.11 (1.52-2.95)   | 1.00E-05 | 38 2    | 9.43  |          |          |             |       |       |
| rs12812325  | 12 |          | T>C | 7 | TT | -                  | -        | 0       | -     | 1.60E-05 | 1.00E-05 | FullImputed | 0.785 | 0.023 |
|             |    |          |     |   | AA | 1.00               | -        | 668 110 | 15.07 |          |          |             |       |       |
|             |    |          |     |   | AG | 1.71 (1.35-2.16)   | 8.20E-06 | 79 7    | 10.77 |          |          |             |       |       |
|             |    |          |     |   | GG | 1.58 (0.50-4.97)   | 0.43     | 3 1     | 10.82 |          |          |             |       |       |
| rs59628740  | 12 |          | T>C | 6 | TT | 1.00               | -        | 666 108 | 15.13 | 1.40E-03 | 1.00E-05 | FullImputed | 0.881 | 0.052 |
|             |    |          |     |   | CT | 1.64 (1.30-2.06)   | 2.40E-05 | 83 10   | 9.9   |          |          |             |       |       |
|             |    |          |     |   | CC | 8.88 (2.35-151.58) | 0.0057   | 1 0     | 2.13  |          |          |             |       |       |
|             |    |          |     |   | CC | 1.64 (1.30-2.06)   | 2.40E-05 | 83 10   | 9.9   |          |          |             |       |       |
| rs138434755 | 15 |          | G>A | 7 | AA | 1.00               | -        | 668 110 | 15.07 | 1.70E-12 | 1.00E-05 | FullImputed | 0.771 | 0.06  |
|             |    |          |     |   | AG | 1.71 (1.35-2.16)   | 8.20E-06 | 79 7    | 10.77 |          |          |             |       |       |
|             |    |          |     |   | GG | 1.58 (0.50-4.97)   | 0.43     | 3 1     | 10.82 |          |          |             |       |       |
|             |    |          |     |   | TT | 1.00               | -        | 666 108 | 15.13 |          |          |             |       |       |
| rs116765767 | 21 |          | C>T | 7 | TC | 1.64 (1.30-2.06)   | 2.40E-05 | 83 10   | 9.9   | 1.70E-12 | 1.00E-05 | FullImputed | 0.881 | 0.052 |
|             |    |          |     |   | CC | 8.88 (2.35-151.58) | 0.0057   | 1 0     | 2.13  |          |          |             |       |       |
|             |    |          |     |   | CC | 1.64 (1.30-2.06)   | 2.40E-05 | 83 10   | 9.9   |          |          |             |       |       |
|             |    |          |     |   | CC | 8.88 (2.35-151.58) | 0.0057   | 1 0     | 2.13  |          |          |             |       |       |

<sup>a</sup>Obtained from RegulomeDB online. 1a-1f: expression quantitative trait loci (eQTL) + TF binding; 2a-5: TF binding + others; 6-7: others.

<sup>b</sup>Obtained from Cox regression model adjusted for age, sex, tumor stage, resection, chemotherapy, and five principal components accounting for population substructure.

<sup>c</sup>Median survival time.

<sup>d</sup>Obtained from likelihood ratio test coupled with Cox regression model with SNP encoded as additive effect, adjusted for the same covariates as <sup>a</sup>.

<sup>e</sup>Quality control for imputation. Quality score of >0.3 was used in our analysis.
