# Supplementary material
Source: PubMed Central journal article supplement (PMC5851439)
Supplement: NIHMS944566-supplement-STable_2.pdf [file NIHMS944566-supplement-STable_2.pdf]

STable 2. SNP: rs113988120 and variants with  $r^2 \geq 0.4$

| Variant     | position<br>(hg38) | LD<br>( $r^2$ ) | LD<br>(D') | EUR<br>frequency | Enhancer<br>histone<br>marks | DNase | Motifs<br>changed | Selected<br>eQTL<br>hits | GENCODE<br>genes |
|-------------|--------------------|-----------------|------------|------------------|------------------------------|-------|-------------------|--------------------------|------------------|
| rs34634781  | 71088558           | 0.49            | 0.77       | 0.01             |                              |       |                   | 1 hit                    | 8.8kb 3' c       |
| rs35098046  | 71106318           | 0.49            | 0.77       | 0.01             |                              |       | BCL<br>ERalpha-a, | 1 hit                    | 3.4kb 3' c       |
| rs34022557  | 71111716           | 0.49            | 0.77       | 0.01             | LIV                          |       | NRSF              | 1 hit                    | MCEE             |
| rs113988120 | 71220545           | 1               | 1          | 0.01             | BLD                          |       | 5 altered motifs  |                          | PAIP2B           |
| rs112493246 | 71459496           | 0.9             | 1          | 0.01             | 10 tissues                   | PLCNT | 7 altered motifs  |                          | DYSF             |
| rs138529893 | 71461486           | 0.9             | 1          | 0.01             | 14 tissues                   | IPSC  | Myf               |                          | DYSF             |
