# Supplementary material
Source: PubMed Central journal article supplement (PMC5851439)
Supplement: NIHMS944566-supplement-STable_3.pdf [file NIHMS944566-supplement-STable_3.pdf]

**Table 3. IPA analysis of significant canonical pathways in the GWAS dataset<sup>a</sup>**

| <b>Pathways</b>                              | <b><i>P</i> value<sup>b</sup></b> | <b>q value<sup>c</sup></b> | <b>Ratio<sup>d</sup></b> |
|----------------------------------------------|-----------------------------------|----------------------------|--------------------------|
| G beta-gamma signaling                       | 0.0000177                         | 0.012                      | 7/88                     |
| CXCR4 signaling                              | 0.0000882                         | 0.03                       | 8/152                    |
| CREB signaling in neurons                    | 0.000199                          | 0.07                       | 8/171                    |
| CCR5 signaling in macrophages                | 0.000451                          | 0.08                       | 5/69                     |
| Agrin interactions at neuromuscular junction | 0.000447                          | 0.08                       | 5/69                     |

<sup>a</sup>IPA was conducted on genes with the tagged SNPs that had  $P < 0.0005$  in Cox regression.

<sup>b</sup>Calculated using Fisher exact test (right-tailed).

<sup>c</sup>q value method to correct multiple comparisons.

<sup>d</sup>No. of genes in current study included in a pathway/no. of all genes making up the core pathway.

---

**Molecules**

---

GNG4, GNAO1, GNB5, PRKCE ,GNAL, PRKCA, EGFR

GNG4, DOCK1, GNAO1, GNB5, PRKCE, MAPK9, GNAL, PRKCA

GNG4, GNAO1, GNB5, PRKCE, GRIK2, GRIA4, GNAL, PRKCA

GNG4, GNB5, PRKCE, MAPK9, PRKCA

NRG3, LAMA2, MAPK9, ITGAL, EGFR

---

on of the GWAS data.

esponding pathway.
