# Supplementary material
Source: PubMed Central journal article supplement (PMC5851439)
Supplement: NIHMS944566-supplement-STable_4.pdf [file NIHMS944566-supplement-STable_4.pdf]

STable 4. Top SNPs associated with survival of pancreatic cancer by previous GWAS

| SNP        | Chromosome | Gene    | Risk allele | HR (95% CI)      | P value     | Reference No. <sup>a</sup> | P value for                    |                                       |
|------------|------------|---------|-------------|------------------|-------------|----------------------------|--------------------------------|---------------------------------------|
|            |            |         |             |                  |             |                            | MDA GWAS analysis <sup>b</sup> | Imputation quality score <sup>c</sup> |
| rs763780   | 6          | IL17F   | G           | 3.3 (2.1–5.1)    | 2.61E-08    | 9                          | 0.37                           | 0.978                                 |
| rs7771466  | 6          | IL17F   | A           | 3.1 (2.0–4.9)    | 0.000000166 | 9                          | 0.33                           | 0.982                                 |
| rs2900174  | 12         | PRB2    | G           | 3.3 (2.0–5.5)    | 0.00000103  | 9                          | 0.99                           | 0.928                                 |
| rs11062040 | 12         | DCP1B   | A           | 1.4 (1.2–1.7)    | 0.00000757  | 9                          | 0.063                          | 0.97                                  |
| rs11644322 | 16         | WVVOX   | A           | 1.6 (1.3–2.0)    | 0.0000131   | 9                          | 0.58                           | 0.947                                 |
| rs10736526 | 11         | UBASH3B | A           | 1.6 (1.3–1.9)    | 0.000015    | 9                          | 0.072                          | 0.88                                  |
| rs179619   | 16         | NA      | G           | 1.5 (1.3–1.9)    | 0.0000207   | 9                          | 0.47                           | 0.984                                 |
| rs306104   | 5          | CAMK4   | A           | 1.5 (1.2–1.8)    | 0.0000231   | 9                          | 0.51                           | 0.95                                  |
| rs3744311  | 17         | NA      | G           | 1.5 (1.2–1.7)    | 0.0000253   | 9                          | 0.44                           | 0.815                                 |
| rs10489997 | 2          | BAZ2B   | A           | 1.5 (1.2–1.7)    | 0.000026    | 9                          | 0.7                            | 0.961                                 |
| rs1910236  | 3          | NA      | A           | 1.4 (1.2–1.7)    | 0.0000271   | 9                          | 0.86                           | 1                                     |
| rs7149097  | 14         | NA      | A           | 1.6 (1.3–1.9)    | 0.0000384   | 9                          | 0.53                           | 1                                     |
| rs10883617 | 10         | BTRC    | G           | 1.5 (1.2–1.8)    | 0.0000394   | 9                          | 0.36                           | 0.96                                  |
| rs490332   | 5          | NA      | A           | 1.5 (1.2–1.7)    | 0.0000432   | 9                          | 0.82                           | 1                                     |
| rs2550731  | 16         | WVVOX   | A           | 1.4 (1.2–1.7)    | 0.0000444   | 9                          | 0.6                            | 0.924                                 |
| rs12361312 | 11         | NA      | A           | 1.5 (1.2–1.8)    | 0.0000462   | 9                          | NA                             | NA                                    |
| rs4785367  | 16         | NA      | G           | 1.4 (1.2–1.7)    | 0.0000506   | 9                          | 0.54                           | 0.851                                 |
| rs814951   | 1          | NA      | A           | 1.4 (1.2–1.7)    | 0.0000538   | 9                          | 0.37                           | 0.992                                 |
| rs7712169  | 5          | NA      | A           | 2.9 (1.7–5.0)    | 0.0000564   | 9                          | 0.53                           | 0.991                                 |
| rs1808458  | 2          | NA      | A           | 2.4 (1.6–3.8)    | 0.0000616   | 9                          | 0.16                           | 0.955                                 |
| rs12362504 | 11         | SBF2    | C           | 1.40 (1.23-1.58) | 0.000000163 | 7                          | 0.59                           | 0.994                                 |
| rs981621   | 18         | C18orf1 | G           | 1.39 (1.23-1.57) | 0.000000165 | 7                          | 0.87                           | 0.933                                 |
| rs7237577  | 18         | C18orf1 | G           | 1.39 (1.23-1.57) | 0.000000165 | 7                          | 0.87                           | 0.932                                 |
| rs11080646 | 18         | C18orf1 | C           | 1.39 (1.23-1.57) | 0.000000166 | 7                          | 0.7                            | 0.93                                  |
| rs7231366  | 18         | C18orf1 | C           | 1.39 (1.23-1.57) | 0.000000181 | 7                          | 0.91                           | 0.942                                 |
| rs9300100  | 11         | SBF2    | G           | 1.39 (1.23-1.58) | 0.000000199 | 7                          | 0.59                           | 0.996                                 |
| rs17681406 | 18         | C18orf1 | T           | 1.39 (1.23-1.57) | 0.000000208 | 7                          | 0.74                           | 0.932                                 |
| rs10084046 | 18         | C18orf1 | G           | 1.38 (1.22-1.57) | 0.000000212 | 7                          | 0.87                           | 0.942                                 |
| rs9948620  | 18         | C18orf1 | T           | 1.38 (1.22-1.57) | 0.000000241 | 7                          | 0.68                           | 0.933                                 |
| rs4910067  | 11         | SBF2    | T           | 1.41 (1.24-1.60) | 0.000000274 | 7                          | 0.98                           | 0.971                                 |
| rs1107340  | 18         | C18orf1 | C           | 1.39 (1.23-1.58) | 0.000000323 | 7                          | 0.94                           | 0.938                                 |
| rs16861827 | 1          | IGSF21  | T           | 1.70 (1.39-2.09) | 0.000000375 | 7                          | 0.013                          | 0.981                                 |
| rs9954359  | 18         | C18orf1 | G           | 1.39 (1.23-1.58) | 0.000000409 | 7                          | 0.71                           | 0.983                                 |
| rs2276392  | 18         | C18orf1 | A           | 1.39 (1.23-1.58) | 0.000000409 | 7                          | 0.73                           | 0.983                                 |
| rs8094197  | 18         | C18orf1 | A           | 1.39 (1.22-1.58) | 0.00000041  | 7                          | 0.71                           | 0.986                                 |
| rs7122293  | 11         | SBF2    | G           | 1.40 (1.23-1.60) | 0.000000436 | 7                          | 0.85                           | 0.956                                 |
| rs7227361  | 18         | C18orf1 | T           | 1.40 (1.23-1.59) | 0.000000459 | 7                          | 0.93                           | 0.976                                 |
| rs6662005  | 1          | ERO1LB  | A           | 1.71 (1.39-2.12) | 0.000000542 | 7                          | 0.42                           | 1                                     |
| rs9946524  | 18         | C18orf1 | C           | 1.39 (1.22-1.58) | 0.00000055  | 7                          | 0.59                           | 0.946                                 |
| rs897035   | 18         | C18orf1 | G           | 1.40 (1.23-1.59) | 0.000000558 | 7                          | 0.58                           | 0.973                                 |
| rs17275283 | 11         | NA      | C           | 1.37 (1.21-1.55) | 0.000000573 | 7                          | 0.81                           | 0.995                                 |
| rs9957621  | 18         | C18orf1 | T           | 1.39 (1.22-1.58) | 0.000000782 | 7                          | 0.38                           | 0.973                                 |
| rs361052   | 3          | NA      | A           | 1.44 (1.25-1.67) | 0.000000784 | 7                          | 0.91                           | 1                                     |
| rs10983614 | 9          | ASTN2   | C           | 0.73 (0.64-0.82) | 0.000000887 | 7                          | 0.75                           | 0.988                                 |
| rs1944788  | 11         | NA      | C           | 1.37 (1.21-1.55) | 0.000000927 | 7                          | 0.8                            | 0.991                                 |
| rs10835188 | 11         | LIN7C   | G           | 0.71 (0.62-0.82) | 0.000000992 | 7                          | 0.3                            | 0.714                                 |
| rs7330800  | 13         | NA      | C           | 1.38 (1.21-1.58) | 0.00000106  | 7                          | 0.46                           | 0.988                                 |
| rs2218400  | 13         | NA      | A           | 1.38 (1.21-1.57) | 0.00000114  | 7                          | 0.43                           | 0.998                                 |
| rs12456874 | 18         | C18orf1 | G           | 1.39 (1.22-1.59) | 0.00000123  | 7                          | 0.21                           | 1                                     |
| rs12620038 | 2          | NA      | G           | 0.72 (0.63-0.82) | 0.00000125  | 7                          | 0.83                           | 0.95                                  |
| rs10840316 | 11         | SBF2    | C           | 1.36 (1.20-1.54) | 0.00000139  | 7                          | 0.51                           | 0.994                                 |
| rs10736390 | 1          | ACOT11  | G           | 0.75 (0.66-0.84) | 0.00000152  | 7                          | 0.93                           | 1                                     |
| rs2017503  | 11         | SBF2    | A           | 1.37 (1.20-1.55) | 0.00000155  | 7                          | 0.88                           | 0.972                                 |
| rs1414153  | 9          | NA      | C           | 1.41 (1.23-1.62) | 0.00000157  | 7                          | 0.095                          | 1                                     |
| rs1944782  | 11         | NA      | G           | 1.36 (1.20-1.54) | 0.00000176  | 7                          | 0.86                           | 0.979                                 |
| rs10818020 | 9          | ASTN2   | T           | 0.74 (0.66-0.84) | 0.00000217  | 7                          | 0.91                           | 0.989                                 |
| rs1416941  | 9          | ASTN2   | C           | 0.74 (0.66-0.84) | 0.00000218  | 7                          | 0.84                           | 0.988                                 |
| rs11790950 | 9          | ASTN2   | G           | 0.74 (0.66-0.84) | 0.0000022   | 7                          | 0.88                           | 0.986                                 |

|            |    |           |   |                  |            |   |       |       |
|------------|----|-----------|---|------------------|------------|---|-------|-------|
| rs10983619 | 9  | ASTN2     | C | 0.74 (0.66-0.84) | 0.00000222 | 7 | 0.31  | 1     |
| rs7853844  | 9  | NA        | A | 1.44 (1.24-1.67) | 0.00000225 | 7 | 0.077 | 0.99  |
| rs7106914  | 11 | SBF2      | C | (0.66-0.84)      | 0.00000233 | 7 | 0.52  | 0.972 |
| rs10500715 | 11 | SBF2      | G | (0.66-0.84)      | 0.00000233 | 7 | 0.53  | 0.972 |
| rs17077369 | 13 | NA        | G | 1.63 (1.33-2.00) | 0.00000251 | 7 | 0.97  | 0.922 |
| rs7202041  | 16 | NA        | A | 1.57 (1.30-1.89) | 0.00000255 | 7 | 0.87  | 0.918 |
| rs12786130 | 11 | LGR4      | C | 0.72 (0.63-0.83) | 0.00000259 | 7 | 0.63  | 0.964 |
| rs4922787  | 11 | LGR4      | G | 0.72 (0.63-0.83) | 0.00000261 | 7 | 0.76  | 0.966 |
| rs770996   | 3  | NA        | T | 1.31 (1.17-1.47) | 0.00000264 | 7 | 0.91  | 0.911 |
| rs2989505  | 9  | NA        | T | 1.43 (1.23-1.66) | 0.00000268 | 7 | 0.042 | 0.988 |
| rs10767646 | 11 | BDNFOS    | T | 0.71 (0.62-0.82) | 0.0000027  | 7 | 0.17  | 0.993 |
| rs12800780 | 11 | SBF2      | T | 1.36 (1.20-1.54) | 0.00000274 | 7 | 0.79  | 0.95  |
| rs10764826 | 10 | NA        | A | 2.19 (1.58-3.04) | 0.00000291 | 7 | 0.48  | 1     |
| rs10818022 | 9  | ASTN2     | A | 0.75 (0.66-0.84) | 0.00000304 | 7 | 0.89  | 0.988 |
| rs823918   | 9  | NA        | G | 1.44 (1.23-1.68) | 0.00000329 | 7 | 0.76  | 0.97  |
| rs10829514 | 10 | NA        | T | 2.18 (1.57-3.03) | 0.00000331 | 7 | 0.42  | 0.985 |
| rs11016537 | 10 | NA        | A | 2.18 (1.57-3.03) | 0.0000035  | 7 | NA    | NA    |
| rs1352757  | 13 | NA        | G | 1.35 (1.19-1.53) | 0.00000353 | 7 | 0.63  | 1     |
| rs7076689  | 10 | NA        | A | 2.54 (1.71-3.77) | 0.00000362 | 7 | 0.17  | 0.955 |
| rs9874556  | 3  | NA        | A | 1.31 (1.17-1.47) | 0.00000364 | 7 | 0.65  | 0.907 |
| rs2152155  | 10 | NA        | C | 2.18 (1.57-3.04) | 0.00000371 | 7 | 0.5   | 0.994 |
| rs10835190 | 11 | LIN7C     | C | 0.72 (0.63-0.83) | 0.00000372 | 7 | 0.26  | 0.997 |
| rs12209785 | 6  | RUNX2     | G | 1.37 (1.20-1.56) | 0.00000373 | 7 | 0.29  | 1     |
| rs6484306  | 11 | LIN7C     | T | 0.71 (0.61-0.82) | 0.00000377 | 7 | 0.38  | 0.962 |
| rs1924687  | 10 | NA        | A | 2.18 (1.57-3.04) | 0.00000386 | 7 | 0.4   | 0.99  |
| rs1038659  | 11 | BDNFOS    | T | 0.72 (0.63-0.83) | 0.00000387 | 7 | 0.26  | 0.997 |
| rs1391315  | 1  | SMAP1L    | G | 1.82 (1.41-2.35) | 0.00000407 | 7 | 0.84  | 0.83  |
| rs1567532  | 2  | CTNNA2    | T | 1.38 (1.20-1.58) | 0.00000409 | 7 | 0.75  | 1     |
| rs16827281 | 1  | SMAP1L    | G | 1.84 (1.42-2.38) | 0.00000427 | 7 | 0.97  | 0.821 |
| rs16827276 | 1  | SMAP1L    | T | 1.81 (1.41-2.34) | 0.00000442 | 7 | 0.97  | 0.822 |
| rs10741177 | 10 | NA        | C | 2.17 (1.56-3.03) | 0.00000443 | 7 | 0.4   | 0.987 |
| rs10734079 | 10 | NA        | T | 2.63 (1.74-3.98) | 0.00000446 | 7 | 0.5   | 0.968 |
| rs10829515 | 10 | NA        | C | 2.21 (1.57-3.09) | 0.00000451 | 7 | NA    | NA    |
| rs4757645  | 11 | GTF2H1    | C | 1.42 (1.22-1.65) | 0.00000453 | 7 | 0.61  | 0.89  |
| rs12790913 | 11 | LGR4      | A | 0.73 (0.64-0.84) | 0.00000463 | 7 | 0.73  | 0.983 |
| rs6484308  | 11 | LIN7C     | T | 0.73 (0.63-0.83) | 0.00000472 | 7 | 0.26  | 0.993 |
| rs12101726 | 15 | LOC400455 | C | 1.83 (1.41-2.36) | 0.0000048  | 7 | 0.39  | 1     |
| rs1408537  | 10 | NA        | C | 2.17 (1.55-3.02) | 0.00000507 | 7 | 0.36  | 0.988 |
| rs1630858  | 9  | NA        | C | 1.49 (1.26-1.77) | 0.00000516 | 7 | 0.8   | 0.973 |
| rs4382459  | 8  | DEPDC2    | T | 1.56 (1.29-1.89) | 0.00000522 | 7 | 0.18  | 0.871 |
| rs12577586 | 11 | BDNFOS    | C | 0.72 (0.63-0.83) | 0.00000528 | 7 | 0.16  | 0.999 |
| rs1408536  | 10 | NA        | A | 2.16 (1.55-3.01) | 0.00000581 | 7 | 0.36  | 0.985 |
| rs9539806  | 13 | NA        | G | 1.32 (1.17-1.50) | 0.00000586 | 7 | 0.32  | 1     |
| rs2031966  | 6  | RUNX2     | G | 1.35 (1.18-1.53) | 0.00000624 | 7 | 0.019 | 0.995 |
| rs6905181  | 6  | RUNX2     | A | 1.35 (1.18-1.53) | 0.00000627 | 7 | 0.019 | 0.995 |
| rs4438954  | 6  | RUNX2     | G | 1.35 (1.18-1.53) | 0.00000628 | 7 | 0.019 | 0.995 |
| rs13207392 | 6  | RUNX2     | T | 1.35 (1.18-1.53) | 0.00000628 | 7 | 0.019 | 0.994 |
| rs11693318 | 2  | CTNNA2    | A | 1.37 (1.19-1.57) | 0.00000628 | 7 | 0.73  | 1     |
| rs6458446  | 6  | RUNX2     | A | 1.35 (1.18-1.53) | 0.00000633 | 7 | 0.019 | 0.995 |
| rs823920   | 9  | NA        | G | 1.43 (1.22-1.67) | 0.00000662 | 7 | 0.62  | 0.972 |
| rs11756145 | 6  | RUNX2     | T | 1.36 (1.19-1.55) | 0.00000686 | 7 | 0.26  | 0.997 |
| rs12195878 | 6  | RUNX2     | T | 1.36 (1.19-1.55) | 0.00000689 | 7 | 0.28  | 0.993 |
| rs7755257  | 6  | RUNX2     | G | 1.35 (1.18-1.53) | 0.0000069  | 7 | 0.022 | 0.992 |
| rs10817611 | 9  | DFNB31    | C | 1.44 (1.23-1.68) | 0.00000696 | 7 | 0.65  | 0.979 |
| rs9593831  | 13 | NA        | T | 1.55 (1.28-1.87) | 0.00000713 | 7 | 0.59  | 0.816 |
| rs6484311  | 11 | LIN7C     | G | 0.73 (0.63-0.83) | 0.00000718 | 7 | 0.26  | 0.996 |
| rs11639759 | 16 | NA        | T | 1.56 (1.28-1.89) | 0.00000729 | 7 | 0.82  | 0.897 |
| rs1335411  | 9  | ASTN2     | C | 0.76 (0.67-0.86) | 0.00000746 | 7 | 0.5   | 0.986 |
| rs1165805  | 9  | NA        | A | 1.43 (1.22-1.67) | 0.00000754 | 7 | 0.73  | 0.975 |
| rs1000589  | 13 | NA        | T | 1.31 (1.17-1.48) | 0.00000762 | 7 | 0.4   | 0.999 |
| rs7866774  | 9  | ASTN2     | T | 0.76 (0.67-0.86) | 0.00000767 | 7 | 0.43  | 0.992 |
| rs9517906  | 13 | CLYBL     | T | 0.75 (0.66-0.85) | 0.00000769 | 7 | 0.37  | 0.695 |
| rs9783347  | 11 | GTF2H1    | A | 1.38 (1.20-1.59) | 0.00000778 | 7 | 0.56  | 0.992 |
| rs6458444  | 6  | RUNX2     | A | 1.35 (1.19-1.55) | 0.00000824 | 7 | 0.022 | 0.991 |
| rs11663785 | 18 | C18orf1   | C | 1.37 (1.19-1.57) | 0.00000833 | 7 | 0.099 | 0.957 |

|            |    |           |   |                   |            |   |       |       |
|------------|----|-----------|---|-------------------|------------|---|-------|-------|
| rs1479821  | 15 | LOC400455 | C | 1.69 (1.34-2.12)  | 0.00000844 | 7 | 0.31  | 0.976 |
| rs16827275 | 1  | SMAP1L    | T | 1.69 (1.34-2.13)  | 0.00000854 | 7 | 0.24  | 0.833 |
| rs17124276 | 14 | KCNK10    | T | 1.36 (1.19-1.56)  | 0.00000858 | 7 | 0.7   | 0.981 |
| rs10835187 | 11 | LGR4      | C | 0.77 (0.68-0.86)  | 0.00000892 | 7 | 0.033 | 0.953 |
| rs1225     | 18 | C18orf1   | A | 1.32 (1.17-1.49)  | 0.00000903 | 7 | 0.98  | 0.944 |
| rs4536164  | 11 | LGR4      | A | 0.75 (0.66-0.85)  | 0.00000911 | 7 | 0.31  | 0.953 |
| rs7850624  | 9  | ASTN2     | T | 0.76 (0.68-0.86)  | 0.00000911 | 7 | 0.17  | 0.997 |
| rs11791873 | 9  | ASTN2     | G | 0.75 (0.67-0.85)  | 0.00000917 | 7 | 0.97  | 0.968 |
| rs4797764  | 18 | C18orf1   | G | 1.32 (1.17-1.49)  | 0.00000919 | 7 | 0.98  | 0.942 |
| rs6458445  | 6  | RUNX2     | T | 1.34 (1.18-1.53)  | 0.0000092  | 7 | 0.022 | 0.992 |
| rs10485422 | 6  | RUNX2     | A | 1.35 (1.18-1.55)  | 0.00000922 | 7 | 0.28  | 0.993 |
| rs10835201 | 11 | BDNFOS    | G | 0.73 (0.63-0.84)  | 0.00000934 | 7 | 0.18  | 1     |
| rs4596     | 11 | GTF2H1    | G | 1.34 (1.18-1.53)  | 0.00000938 | 7 | 0.32  | 0.99  |
| rs4150579  | 11 | HPS5      | A | 1.34 (1.18-1.53)  | 0.00000942 | 7 | 0.64  | 1     |
| rs4150564  | 11 | HPS5      | G | 1.34 (1.18-1.53)  | 0.00000943 | 7 | 0.56  | 0.998 |
| rs4150575  | 11 | HPS5      | C | 1.34 (1.18-1.53)  | 0.00000943 | 7 | 0.59  | 0.999 |
| rs4150622  | 11 | GTF2H1    | A | 1.34 (1.18-1.53)  | 0.0000095  | 7 | 0.56  | 0.999 |
| rs10788473 | 10 | GRID1     | T | 1.33 (1.17-1.51)  | 0.00000955 | 7 | 0.83  | 0.987 |
| rs4150616  | 11 | GTF2H1    | A | 1.34 (1.18-1.53)  | 0.00000957 | 7 | 0.64  | 0.999 |
| rs13431245 | 2  | NA        | C | 1.41 (1.21-1.63)  | 0.00000962 | 7 | 0.74  | 0.995 |
| rs4150612  | 11 | GTF2H1    | G | 1.34 (1.18-1.53)  | 0.00000969 | 7 | 0.71  | 0.999 |
| rs4150615  | 11 | GTF2H1    | C | 1.34 (1.18-1.53)  | 0.00000972 | 7 | 0.64  | 0.999 |
| rs4150610  | 11 | GTF2H1    | A | 1.34 (1.18-1.53)  | 0.00000973 | 7 | 0.56  | 0.999 |
| rs6479073  | 9  | NA        | G | 1.43 (1.22-1.67)  | 0.00000979 | 7 | 0.51  | 0.977 |
| rs4150561  | 11 | HPS5      | T | 1.34 (1.18-1.53)  | 0.00000979 | 7 | 0.56  | 0.997 |
| rs4150562  | 11 | HPS5      | A | 1.34 (1.18-1.53)  | 0.00000979 | 7 | 0.64  | 0.998 |
| rs4150550  | 11 | HPS5      | C | 1.34 (1.18-1.53)  | 0.00000988 | 7 | 0.71  | 0.997 |
| rs4150673  | 11 | GTF2H1    | T | 1.35 (1.18-1.55)  | 0.00001    | 7 | 0.56  | 0.994 |
| rs1482426  | 12 | NA        | G | 1.95 (1.42-2.67)  | 0.0000036  | 8 | 0.57  | 0.984 |
| rs4285214  | 5  | ZNF608    | G | 1.65 (1.35-2.02)  | 0.00000079 | 8 | 0.47  | 0.946 |
| rs7849571  | 9  | NA        | G | 1.63 (1.28-2.07)  | 0.0000072  | 8 | 0.17  | 0.955 |
| rs1115E-40 | 18 | NA        | T | 2.57 (1.61-4.E-)  | 0.0000076  | 8 | NA    | NA    |
| rs3747572  | 16 | GLIS2     | C | 1.83 (1.39-2.40)  | 0.0000013  | 8 | 0.31  | 1     |
| rsE-189511 | 2  | NA        | A | 2.11 (1.51-2.95)  | 0.0000012  | 8 | NA    | NA    |
| rs1344963  | 12 | NA        | T | 2.59 (1.69-3.97)  | 0.0000014  | 8 | 0.57  | 1     |
| rs4903736  | 14 | NA        | A | 1.59 (1.27-1.98)  | 0.0000045  | 8 | 0.27  | 0.982 |
| rs1E-24097 | 11 | PLEKHA7   | T | 1.54 (1.25-1.90)  | 0.0000042  | 8 | NA    | NA    |
| rs4903741  | 14 | NA        | C | 1.57 (1.25-1.96)  | 0.0000087  | 8 | 0.4   | 0.978 |
| rs12835268 | X  | NA        | C | 1.5 (1.24-1.82)   | 0.0000034  | 8 | NA    | NA    |
| rs16867625 | 8  | NA        | T | 2.33 (1.55-3.51)  | 0.000005   | 8 | 0.7   | 1     |
| rs7016046  | 8  | NA        | A | 1.83 (1.38-2.43)  | 0.0000031  | 8 | 0.55  | 1     |
| rs2056096  | 18 | NA        | T | 1.55 (1.25-1.93)  | 0.0000073  | 8 | 0.33  | 0.815 |
| rs8034546  | 15 | NA        | T | 1.62 (1.29-2.04)  | 0.000004   | 8 | 0.25  | 1     |
| rs1867348  | 6  | IGF2R     | T | 2.02 (1.43-2.85)  | 0.0000063  | 8 | 0.57  | 0.991 |
| rs956518   | 4  | NA        | G | 0.62 (0.50-0.79)  | 0.0000057  | 8 | 0.56  | 1     |
| rsE-167E-3 | 2  | NA        | C | 1.53 (1.25-1.88)  | 0.000005   | 8 | NA    | NA    |
| rs38402    | 7  | GGCT      | G | 4.75 (2.19-E-.31) | 0.0000082  | 8 | 0.21  | 0.685 |
| rs3795244  | 17 | ZNF207    | T | 2.46 (1.69-3.58)  | 0.0000003  | 8 | 0.69  | 0.819 |
| rs1944395  | 18 | NA        | C | 1.5 (1.23-1.84)   | 0.0000083  | 8 | 0.59  | 1     |
| rs1388193  | 13 | NA        | T | 1.77 (1.34-2.34)  | 0.0000065  | 8 | 0.83  | 0.984 |

aRefer to reference number in the main text.

bObtained from Cox regression model adjusted for age, sex, tumor stage, resection, chemotherapy, and five principal components accounting for population structure.

cQuality control for imputation. SNPs with quality scores of >0.3 were used in our analysis.

NA: not applicable
